# Supplementary material for: Redox and structural properties of accessible actinide(ii) metallocalixarenes (Ac to Pu): a relativistic DFT study
Source: Royal Society of Chemistry journal article supplement (doi:10.1039/d0ra05365a), 2020-01-01
Supplement: d0ra05365a1.pdf [file d0ra05365a1.pdf]

## Supporting information

### Redox and Structural Properties of Accessible Actinide(II)

### Metallocalixarene (Ac to Pu): a Relativistic DFT Study

Shuai Niu,<sup>§</sup> Hong-Xue Cai,<sup>§</sup> Hong-Bo Zhao, Li Li and Qing-Jiang Pan\*

*Key Laboratory of Functional Inorganic Material Chemistry of Education Ministry, School of Chemistry and Materials Science, Heilongjiang University, Harbin 150080, China*

#### Corresponding author

\*Email: [panqjtc@163.com](mailto:panqjtc@163.com) (QJP)

#### ORCID

Qing-Jiang Pan: 0000-0003-2763-6976

#### Author Contribution

<sup>§</sup> The two authors contributed to the work equally.

## Discussion on isomers and effects of different levels of theory on structures

Regarding cases that valence electrons may be singly or doubly filled into frontier molecular orbitals, divalent and trivalent actinide complexes have different electron-spin state (ESS) for their ground state. Herein, we fully optimized U(II) and U(III) complexes of  $L^n$  at the level of theory Pri: PBE/B-I/gas. As seen in Table S1, the calculated relative energies show that the highest ESS is the energy-lowest among isomers for all the U(III) complexes, which is consistent with previous studies.<sup>1-9</sup>

Most divalent complexes give the same manner, for example  $L^2\sim L^4$  ones.  $[UL^1]^-$  is exceptional with the triplet ground state. So we further optimized structures of  $[AnL^1]^-$  ( $An = Th\sim Pu$ ) in all possible ESSs. Calculated energies (Table S2) show single, doublet, triplet, quartet and heptet **ground** state, respectively. Therefore, the highest ESS was centered on for all complexes with the exception of  $[AnL^1]^-$  in the work.

Considering possible geometric isomers, we took  $[UL^2]$  as an example. Three energetically stable isomers, labeled as  $[UL^2]$ ,  $[UL^2]'$  and  $[UL^2]''$  (Figure 1), were found. Energetic comparison shows that  $[UL^2]$  is the energy-lowest. Geometric parameters were presented in Table S4. Additionally, a larger basis set B-IV (see details in the footnote of Table S4) was used for optimization. Comparison indicates the smaller basis set B-I is sufficiently reliable for current calculations.

Unless otherwise noted, the level of theory, Pri: PBE/B-I/gas, was used for all structural optimizations. And thus, single-point calculations were conducted using ADF and Gaussian codes to obtain solvation/spin-orbit coupling energies and QTAIM-related parameters, respectively. To verify this, we optimized structures of  $[AnL^2]^z$  ( $An = Th, Pa, U$  and  $Np$ ;  $z = 0$  and  $+1$ ) at the level of ADF: PBE/B-II/gas. Slight differences were found for geometric parameters, electron-spin density and atomic charges as seen in Tables S5~S8. Further considering the spin-orbit coupling effects using the ADF code,  $[UL^2]$  was chosen and optimized, which shows close results to those at the scalar level (Table S4).

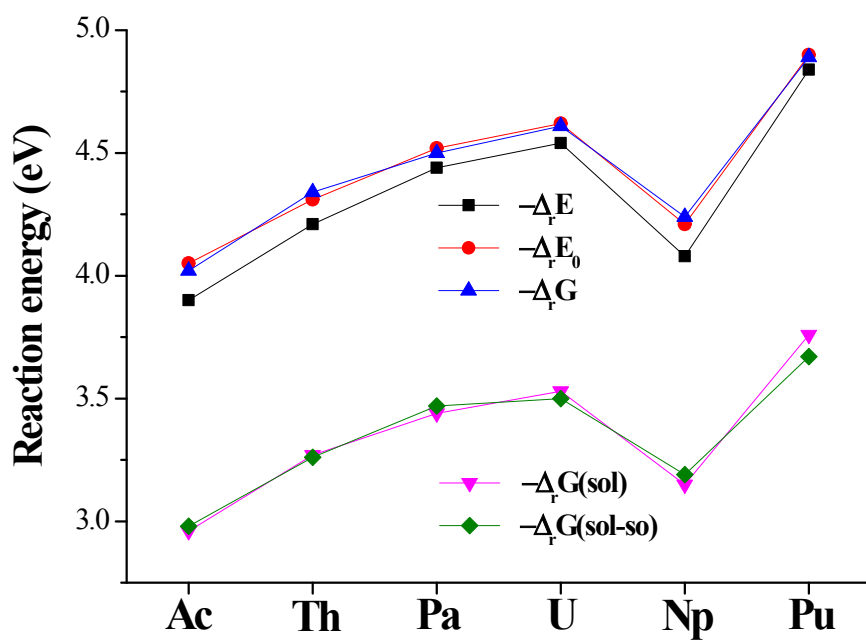

**Figure S1.** Plots of various energies of the single-electron reaction  $[AnL^2]^+ + e = [AnL^2]$  (An = Ac~Pu). For convenient comparison, their minus values were used.

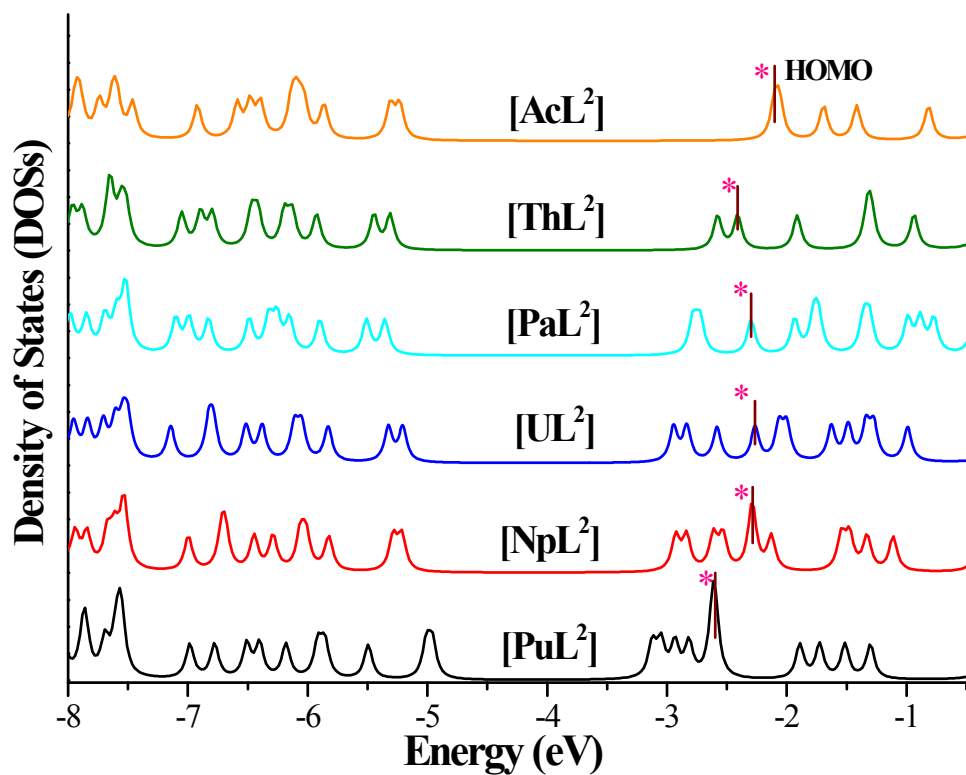

**Figure S2.** Total DOSs of [AnL<sup>2</sup>] (An = Ac~Pu), where the  $\alpha$ -spin orbitals are plotted and HOMO of each complex is marked with a star.

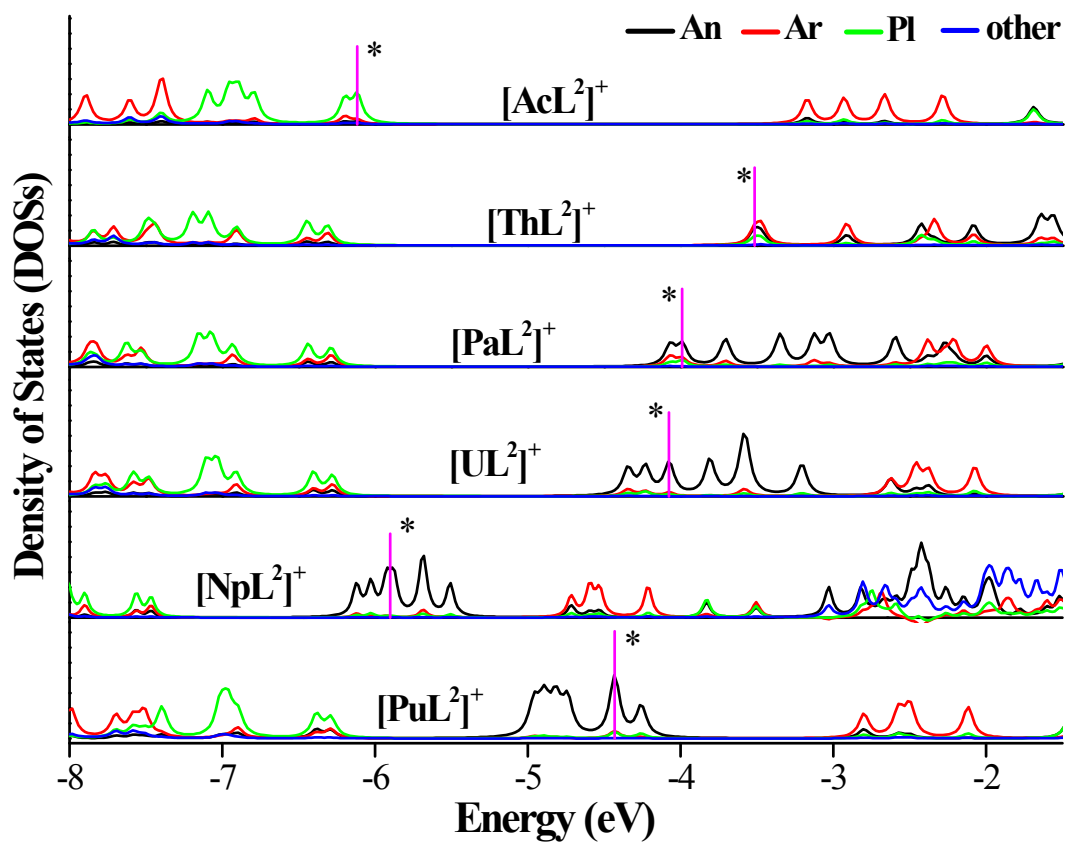

**Figure S3.** Density of states (DOSs) of each fragment of  $[AnL^2]^+$  ( $An = Ac \sim Pu$ ), where the  $\alpha$ -spin orbitals are plotted except for close-shell  $[AcL^2]^+$ , and HOMO of each complex is marked with a star.

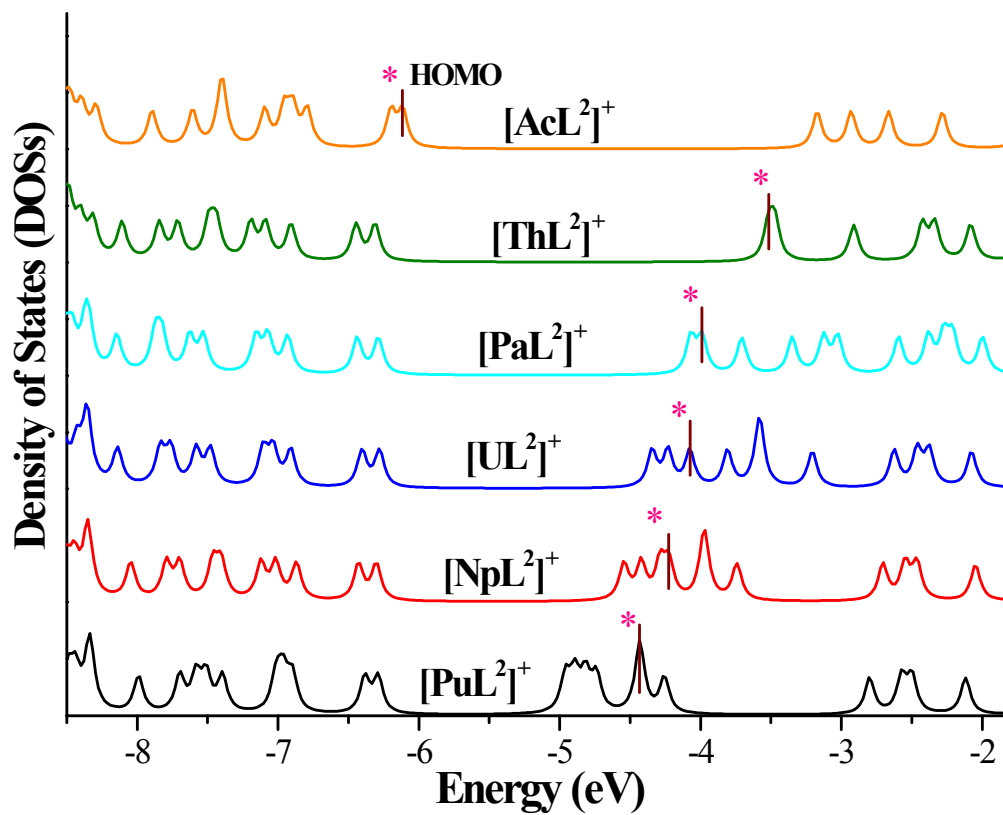

**Figure S4.** Total DOSs of  $[\text{AnL}^{2+}]$  (An = Ac~Pu), where the  $\alpha$ -spin orbitals are plotted except for close-shell  $[\text{AcL}^{2+}]$ , and HOMO of each complex is marked with a star.

## **Discussion about the density-functional and geometry effects on electronic configuration of the U(II) center**

The electronic configuration of the U(II) center in complex uranium could be density functional-dependent and geometry dependent. To consider the former, different functionals (GGA-PBE, hybrid PBE0, and hybrid B3LYP) implemented in the ADF code were used to calculate the complex [UL<sup>2</sup>] at the Priroda-optimized geometry. Regarding the latter issue, we used Priroda and ADF codes to optimize the structure of [UL<sup>2</sup>]. At these two geometries, the level of theory, ADF: PBE/B-II/ZORA/THF, was exploited to calculate electronic structures of [UL<sup>2</sup>].

The inspection of high-lying uranium-based orbitals (Figures S5 and S6) and orbital compositions finds two pure 5f-character orbitals and two  $\delta$ (U-Ar) bonding ones, regardless of what density functionals (GGA and Hybrid) and geometries (Priroda and ADF) are used. One can note that geometry change has almost no effect. Regarding different density functionals, the order of orbitals with different character is affected (Figure S5). However, the 5f<sup>4</sup> electronic configuration for U(II) was obtained by all density functionals, but a little more 6d participation was found in the hybrid results.

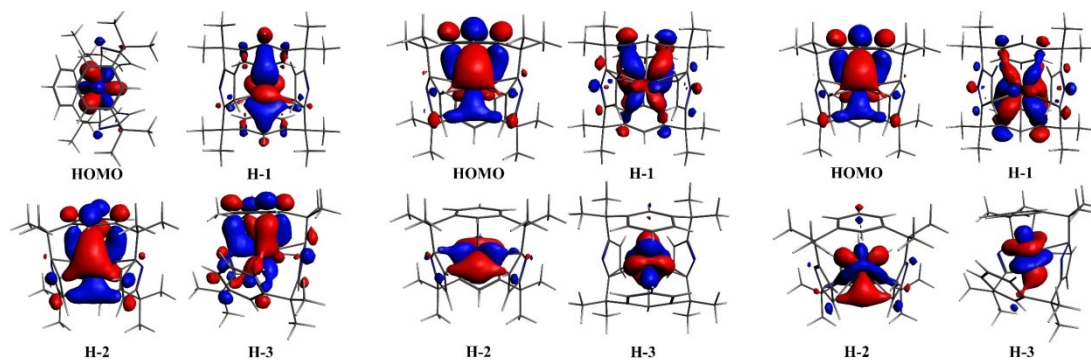

**Figure S5.** Four high-lying metal-based  $\alpha$ -spin orbitals of  $[\text{UL}^2]$  calculated by ADF: DFT/TZP/ZORA/COSMO level, where density functionals are PBE (left), PBE0 (middle) and B3LYP (right).



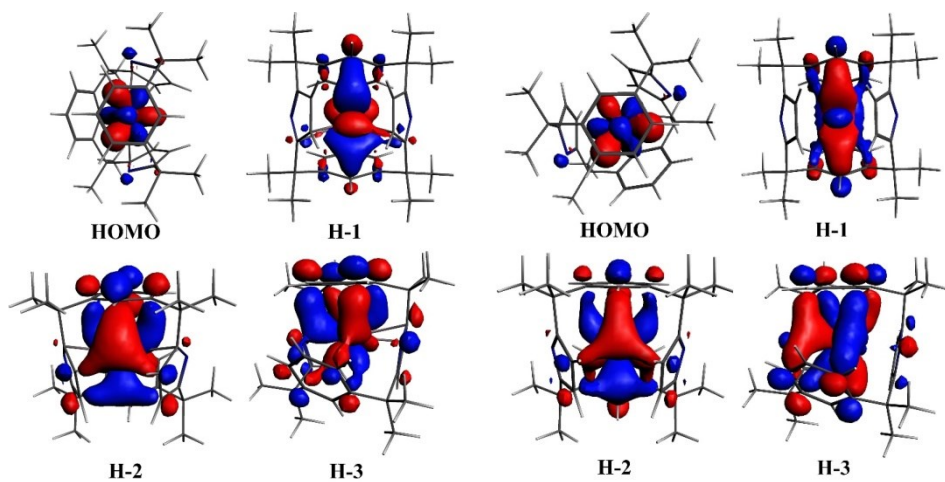

**Figure S6.** Four high-lying metal-based  $\alpha$ -spin orbitals of  $[UL^2]$  calculated by ADF: PBE/TZP/ZORA/COSMO at Priroda-optimized (left) and ADF-optimized (right) geometries.

**Table S1.** Calculated relative energies (eV) of uranium complexes of various ligands ( $L^n$ ,  $n = 1\sim 4$ ) in all possible electron-spin states (ESSs).

| Complexes                        | ESS     | $\Delta E^a$ | $\Delta E_0^a$ | $\Delta H^a$ | $\Delta G^a$ |
|----------------------------------|---------|--------------|----------------|--------------|--------------|
| [UL <sup>1</sup> ] <sup>-</sup>  | Singlet | 0.164        | 0.176          | 0.165        | 0.255        |
|                                  | Triplet | 0.000        | 0.000          | 0.000        | 0.000        |
|                                  | Quintet | 0.059        | 0.086          | 0.082        | 0.086        |
| [UL <sup>2</sup> ]               | Singlet | 0.508        | 0.485          | 0.489        | 0.483        |
|                                  | Triplet | 0.116        | 0.101          | 0.104        | 0.095        |
|                                  | Quintet | 0.000        | 0.000          | 0.000        | 0.000        |
| [UL <sup>3</sup> ] <sup>-</sup>  | Singlet | 1.041        | 0.987          | 0.987        | 0.987        |
|                                  | Triplet | 0.413        | 0.405          | 0.406        | 0.406        |
|                                  | Quintet | 0.000        | 0.000          | 0.000        | 0.000        |
| [UL <sup>4</sup> ] <sup>2-</sup> | Singlet | 0.713        | 0.697          | 0.696        | 0.707        |
|                                  | Triplet | 0.036        | 0.035          | 0.033        | 0.044        |
|                                  | Quintet | 0.000        | 0.000          | 0.000        | 0.000        |
| [UL <sup>1</sup> ]               | Doublet | 0.294        | 0.248          | 0.261        | 0.199        |
|                                  | Quartet | 0.000        | 0.000          | 0.000        | 0.000        |
| [UL <sup>2</sup> ] <sup>+</sup>  | Doublet | 0.343        | 0.328          | 0.328        | 0.333        |
|                                  | Quartet | 0.000        | 0.000          | 0.000        | 0.000        |
| [UL <sup>3</sup> ]               | Doublet | 0.520        | —              | —            | —            |
|                                  | Quartet | 0.000        | 0.000          | 0.000        | 0.000        |
| [UL <sup>4</sup> ] <sup>-</sup>  | Doublet | 0.424        | 0.420          | 0.417        | 0.425        |
|                                  | Quartet | 0.000        | 0.000          | 0.000        | 0.000        |

<sup>a</sup> The total energy (E), the total energy including zero-point vibrational energy ( $E_0$ ) and the free energy correction (G); and  $\Delta E$ ,  $\Delta E_0$  and  $\Delta G$  denote the relative energy with respect to the lowest-energy isomer.

**Table S2.** Calculated relative energies (eV) of  $[\text{AnL}^1]^-$  (An = Ac~Pu) in various ESSs.

| Complexes          | ESS     | $\Delta E$ | $\Delta E_0$ | $\Delta H$ | $\Delta G$ |
|--------------------|---------|------------|--------------|------------|------------|
| $[\text{ThL}^1]^-$ | Singlet | 0.000      | 0.000        | 0.000      | 0.000      |
|                    | Triplet | 0.154      | 0.149        | 0.177      | 0.096      |
| $[\text{PaL}^1]^-$ | Doublet | 0.000      | 0.000        | 0.031      | 0.000      |
|                    | Quartet | 0.376      | 0.405        | 0.407      | 0.344      |
| $[\text{UL}^1]^-$  | Singlet | 0.164      | 0.176        | 0.165      | 0.254      |
|                    | Triplet | 0.000      | 0.000        | 0.000      | 0.000      |
|                    | Quintet | 0.059      | 0.086        | 0.082      | 0.086      |
| $[\text{NpL}^1]^-$ | Doublet | 0.462      | 0.447        | 0.452      | 0.418      |
|                    | Quartet | 0.000      | 0.000        | 0.000      | 0.000      |
|                    | Sextet  | 0.081      | 0.109        | 0.105      | 0.137      |
| $[\text{PuL}^1]^-$ | Singlet | 2.157      | 2.157        | 2.127      | 2.217      |
|                    | Triplet | 1.062      | 1.035        | 1.034      | 1.024      |
|                    | Quintet | 0.413      | 0.370        | 0.376      | 0.367      |
|                    | Heptet  | 0.000      | 0.000        | 0.000      | 0.000      |

**Table S3.** Calculated relative energies (eV) of geometric isomers of [UL<sup>2</sup>] in the quintet state.

| Isomers             | $\Delta E$ | $\Delta E_0$ | $\Delta H$ | $\Delta G$ |
|---------------------|------------|--------------|------------|------------|
| [UL <sup>2</sup> ]  | 0.000      | 0.000        | 0.000      | 0.000      |
| [UL <sup>2</sup> ]' | 0.160      | 0.138        | 0.160      | 0.160      |
| [UL <sup>2</sup> ]" | 0.259      | 0.221        | 0.226      | 0.137      |

**Table S4.** Optimized bond lengths, angles ( $\alpha$  and  $\beta$  in degree) and interplanar arene/pyrrolide angles ( $\gamma$ ) for [UL<sup>2</sup>] in various electron-spin states and geometric isomers, compared with those calculated at larger basis sets.

| Compls.<br>ESS<br>Approach <sup>a</sup> | [UL <sup>2</sup> ] |                  |                |                   |                |                | [UL <sup>2</sup> ]' | [UL <sup>2</sup> ]" |
|-----------------------------------------|--------------------|------------------|----------------|-------------------|----------------|----------------|---------------------|---------------------|
|                                         | Quintet<br>Pri     | Quintet<br>Pri-2 | Quintet<br>ADF | Quintet<br>ADF-so | Triplet<br>Pri | Singlet<br>Pri | Quintet<br>Pri      | Quintet<br>Pri      |
| An-C(t)                                 | 2.786              | 2.784            | 2.768          | 2.794             | 2.775          | 2.797          | 2.721               | 2.659               |
| An-N                                    | 2.715              | 2.716            | 2.710          | 2.720             | 2.698          | 2.717          | 2.432               | 2.381               |
| An-Ar <sub>cent</sub>                   | 2.484              | 2.478            | 2.465          | 2.486             | 2.421          | 2.442          | 2.321               | 2.316               |
| An-Pl <sub>cent</sub>                   | 2.530              | 2.526            | 2.549          | 2.525             | 2.522          | 2.457          | 3.595               | 3.574               |
| $\alpha 1$ <sup>b</sup>                 | 176.7              | 176.6            | 174.8          | 176.9             | 177.7          | 177.5          | 155.4               | 147.8               |
| $\alpha 2$ <sup>b</sup>                 | 170.4              | 170.3            | 168.8          | 170.6             | 169.5          | 170.6          | 146.7               | 136.0               |
| $\beta 1$ <sup>c</sup>                  | 123.6              | 123.6            | 124.8          | 123.5             | 122.3          | 122.8          | 142.5               | 150.9               |
| $\beta 2$ <sup>c</sup>                  | 118.1              | 118.0            | 116.6          | 118.3             | 117.0          | 118.1          | 158.7               | 134.3               |
| $\gamma 1$ <sup>d</sup>                 | 49.9               | 50.1             | 49.4           | 50.2              | 53.7           | 52.3           | 36.5                | 24.2                |
| $\gamma 2$ <sup>d</sup>                 | 55.3               | 55.8             | 54.8           | 55.9              | 55.5           | 62.8           | 2.9                 | 56.4                |

<sup>a</sup> Levels of theory Pri, Pri-2, ADF and ADF-so correspond to Pri: PBE/B-I/AE, Pri: PBE/B-IV/AE, ADF: PBE/B-II/ZORA and ADF: PBE/B-II/SOC-ZORA, respectively. Noting that B-IV, larger than B-I, is all-electron Gaussian correlation-consistent basis sets of triple-zeta quality. AE and ZORA are at the scalar relativistic level, while SOC-ZORA includes the spin-orbit coupling (SOC) effect.

<sup>b</sup>  $\alpha 1$  and  $\alpha 2$  denote the C(t)-An-C(t) and N-An-N angles, respectively. The C(t) atoms are marked in Chart 1b.

<sup>c</sup>  $\beta 1$  and  $\beta 2$  are the Ar<sub>cent</sub>-An-Ar<sub>cent</sub> and Pl<sub>cent</sub>-An-Pl<sub>cent</sub> angles, respectively, where the subscript “cent” stands for the centroid of the cycle.

<sup>d</sup>  $\gamma 1$  is the interplanar angles between Arenes, and  $\gamma 2$  is between Pyrroles.

**Table S5.** Calculated electron-spin density of each fragment ( $S_{\text{Frag.}}$ ) and charges ( $Q_{\text{Frag.}}$ ) in  $[\text{AnL}^2]^z$  ( $\text{An} = \text{Ac}\sim\text{Pu}$ ,  $z = 0$  and  $+1$ ).<sup>a</sup>

| Complexes          | $S_{\text{An}}$ | $S_{\text{Ar}}$ | $S_{\text{Pl}}$ | $S_{\text{other}}$ | $Q_{\text{An}}$ | $Q_{\text{Ar}}$ | $Q_{\text{Pl}}$ | $Q_{\text{other}}$ |
|--------------------|-----------------|-----------------|-----------------|--------------------|-----------------|-----------------|-----------------|--------------------|
| $[\text{AcL}^2]$   | 0.152           | 0.729           | 0.131           | -0.012             | 1.907           | -0.584          | -0.928          | -0.395             |
| $[\text{ThL}^2]$   | 0.772           | 1.024           | 0.214           | -0.011             | 1.992           | -0.796          | -0.896          | -0.300             |
| $[\text{PaL}^2]$   | 1.796           | 1.078           | 0.107           | 0.018              | 2.003           | -0.840          | -0.859          | -0.304             |
| $[\text{UL}^2]$    | 3.170           | 0.690           | 0.066           | 0.073              | 1.939           | -0.747          | -0.886          | -0.306             |
| $[\text{NpL}^2]$   | 4.453           | 0.508           | 0.028           | 0.012              | 1.869           | -0.644          | -0.918          | -0.307             |
| $[\text{PuL}^2]$   | 5.650           | 0.381           | -0.041          | 0.011              | 1.761           | -0.526          | -0.944          | -0.291             |
| $[\text{AcL}^2]^+$ | 0.000           | 0.000           | 0.000           | 0.000              | 1.946           | -0.182          | -0.728          | -0.036             |
| $[\text{ThL}^2]^+$ | 0.395           | 0.468           | 0.111           | 0.026              | 2.095           | -0.366          | -0.684          | -0.044             |
| $[\text{PaL}^2]^+$ | 1.484           | 0.422           | 0.091           | 0.004              | 2.042           | -0.342          | -0.657          | -0.043             |
| $[\text{UL}^2]^+$  | 2.742           | 0.293           | -0.044          | 0.009              | 2.006           | -0.223          | -0.643          | -0.14              |
| $[\text{NpL}^2]^+$ | 4.012           | 0.188           | -0.115          | -0.085             | 1.961           | -0.255          | -0.664          | -0.042             |
| $[\text{PuL}^2]^+$ | 5.173           | -0.002          | -0.187          | 0.016              | 1.923           | -0.210          | -0.619          | -0.094             |

<sup>a</sup>. Obtained at geometries optimized by the level of theory Pri: PBE/B-I/gas.

**Table S6.** Electron-spin density of each fragment ( $S_{\text{Frag.}}$ ) and charges ( $Q_{\text{Frag.}}$ ) in  $[\text{AnL}^2]^z$  (An = Ac~Pu,  $z = 0$  and  $+1$ ), obtained at geometries optimized by the level of theory ADF: PBE/B-II/gas.

| Complexes                        | $S_{\text{An}}$ | $S_{\text{Ar}}$ | $S_{\text{Pl}}$ | $S_{\text{others}}$ | $Q_{\text{An}}$ | $Q_{\text{Ar}}$ | $Q_{\text{Pl}}$ | $Q_{\text{others}}$ |
|----------------------------------|-----------------|-----------------|-----------------|---------------------|-----------------|-----------------|-----------------|---------------------|
| [AcL <sup>2</sup> ]              | 0.152           | 0.767           | 0.105           | -0.024              | 0.930           | 0.145           | -0.420          | -0.655              |
| [ThL <sup>2</sup> ]              | 0.717           | 1.101           | 0.207           | -0.026              | 0.973           | 0.019           | -0.329          | -0.663              |
| [PaL <sup>2</sup> ]              | 1.712           | 1.177           | 0.132           | -0.021              | 0.934           | 0.032           | -0.319          | -0.646              |
| [UL <sup>2</sup> ]               | 3.123           | 0.839           | 0.038           | 0.000               | 0.625           | 0.262           | -0.264          | -0.624              |
| [NpL <sup>2</sup> ]              | 4.389           | 0.626           | -0.023          | 0.008               | 0.722           | 0.244           | -0.244          | -0.722              |
| [PuL <sup>2</sup> ]              | 5.622           | 0.418           | -0.054          | 0.015               | 0.745           | 0.302           | -0.291          | -0.756              |
| [AcL <sup>2</sup> ] <sup>+</sup> | 0.000           | 0.000           | 0.000           | 0.000               | 0.867           | 0.651           | -0.144          | -0.375              |
| [ThL <sup>2</sup> ] <sup>+</sup> | 0.499           | 0.460           | 0.046           | -0.006              | 0.904           | 0.522           | 0.019           | -0.444              |
| [PaL <sup>2</sup> ] <sup>+</sup> | 1.403           | 0.518           | 0.082           | -0.003              | 0.802           | 0.563           | -0.004          | -0.361              |
| [UL <sup>2</sup> ] <sup>+</sup>  | 2.670           | 0.369           | -0.046          | 0.006               | 0.544           | 0.762           | 0.046           | -0.352              |
| [NpL <sup>2</sup> ] <sup>+</sup> | 4.055           | 0.106           | -0.183          | 0.022               | 0.526           | 0.783           | 0.036           | -0.344              |
| [PuL <sup>2</sup> ] <sup>+</sup> | 5.200           | -0.006          | -0.216          | 0.023               | 0.717           | 0.660           | 0.009           | -0.386              |

**Table S7.** Bond angles ( $\alpha$  and  $\beta$  in degree) and interplanar arene/pyrrolide angles ( $\gamma$ ) of actinide complexes optimized by Priroda and ADF codes.<sup>a</sup>

| Complexes                            | Approach           | $\alpha 1$ | $\alpha 2$ | $\beta 1$ | $\beta 2$ | $\gamma 1$ | $\gamma 2$ |
|--------------------------------------|--------------------|------------|------------|-----------|-----------|------------|------------|
| [AcL <sup>2</sup> ]                  | Pri                | 175.3      | 172.0      | 128.5     | 120.9     | 42.3       | 42.9       |
| [ThL <sup>2</sup> ]                  | Pri                | 177.8      | 172.9      | 123.5     | 120.9     | 46.5       | 53.1       |
| [PaL <sup>2</sup> ]                  | Pri                | 175.0      | 168.8      | 124.6     | 116.6     | 49.9       | 55.2       |
| [UL <sup>2</sup> ]                   | Pri                | 176.7      | 170.4      | 123.6     | 118.1     | 49.9       | 55.3       |
| [NpL <sup>2</sup> ]                  | Pri                | 179.2      | 174.4      | 121.9     | 121.8     | 44.7       | 51.3       |
| [PuL <sup>2</sup> ]                  | Pri                | 173.5      | 170.6      | 118.7     | 128.7     | 19.6       | 42.0       |
| [AcL <sup>2</sup> ] <sup>+</sup>     | Pri                | 177.6      | 177.4      | 126.8     | 125.3     | 30.4       | 38.0       |
| [ThL <sup>2</sup> ] <sup>+</sup>     | Pri                | 179.3      | 173.5      | 123.1     | 120.2     | 49.7       | 44.9       |
| [PaL <sup>2</sup> ] <sup>+</sup>     | Pri                | 178.7      | 173.2      | 122.8     | 119.6     | 49.1       | 52.8       |
| [UL <sup>2</sup> ] <sup>+</sup>      | Pri                | 177.7      | 171.9      | 123.2     | 117.9     | 48.7       | 50.0       |
| [NpL <sup>2</sup> ] <sup>+</sup>     | Pri                | 179.2      | 173.5      | 122.3     | 119.5     | 47.8       | 50.5       |
| [PuL <sup>2</sup> ] <sup>+</sup>     | Pri                | 178.8      | 175.8      | 121.1     | 121.5     | 44.1       | 46.4       |
| [AcL <sup>2</sup> ]                  | ADF                | 174.4      | 172.2      | 129.2     | 121.1     | 39.1       | 40.9       |
| [ThL <sup>2</sup> ]                  | ADF                | 177.6      | 173.2      | 123.6     | 121.5     | 44.9       | 51.9       |
| [PaL <sup>2</sup> ]                  | ADF                | 174.8      | 168.8      | 124.8     | 116.6     | 49.4       | 54.8       |
| [UL <sup>2</sup> ]                   | ADF                | 174.8      | 168.8      | 124.8     | 116.6     | 49.4       | 54.8       |
| [NpL <sup>2</sup> ]                  | ADF                | 176.1      | 173.1      | 119.5     | 125.9     | 25.8       | 45.1       |
| [PuL <sup>2</sup> ]                  | ADF                | 174.8      | 171.1      | 120.4     | 128.8     | 15.7       | 41.6       |
| [AcL <sup>2</sup> ] <sup>+</sup>     | ADF                | 176.6      | 177.8      | 127.9     | 125.6     | 25.3       | 36.2       |
| [ThL <sup>2</sup> ] <sup>+</sup>     | ADF                | 178.4      | 173.6      | 123.6     | 124.5     | 28.9       | 45.3       |
| [PaL <sup>2</sup> ] <sup>+</sup>     | ADF                | 178.5      | 173.0      | 122.6     | 119.7     | 48.0       | 51.8       |
| [UL <sup>2</sup> ] <sup>+</sup>      | ADF                | 177.3      | 171.7      | 123.4     | 117.8     | 48.4       | 51.0       |
| [NpL <sup>2</sup> ] <sup>+</sup>     | ADF                | 178.4      | 173.6      | 123.0     | 119.8     | 46.3       | 50.1       |
| [PuL <sup>2</sup> ] <sup>+</sup>     | ADF                | 178.6      | 179.3      | 121.1     | 125.0     | 33.2       | 44.0       |
| [UL <sup>2</sup> (BH <sub>4</sub> )] | Pri                | 178.2      | 119.8      | 122.6     | 119.6     | 8.0        | 76.8       |
|                                      | Expt. <sup>b</sup> | 174.7      | 118.9      | 122.0     | 117.4     | 14.2       | 81.5       |
| [UL <sup>2</sup> (I)]                | Pri                | 176.6      | 119.5      | 117.9     | 119.3     | 11.8       | 78.0       |
|                                      | Expt. <sup>b</sup> | 170.7      | 118.3      | 121.4     | 117.0     | 16.4       | 82.2       |

<sup>a</sup>  $\alpha 1$  and  $\alpha 2$  denote the C(t)-An-C(t) and N-An-N angles, respectively. The C(t) atoms are marked in Chart 1b.  $\beta 1$  and  $\beta 2$  are the  $Ar_{cent}$ -An- $Ar_{cent}$  and  $Pl_{cent}$ -An- $Pl_{cent}$  angles, respectively, where the subscript “cent” stands for the centroid of the cycle.  $\gamma 1$  is the interplanar angles between arenes, and  $\gamma 2$  is between pyrroles.

<sup>b</sup>-Experimental values from Refs.<sup>10, 11</sup>.



**Table S8.** Bond lengths <sup>a</sup> (Å) of [AnL<sub>2</sub>]<sup>z</sup> (An = Ac~Pu, z = 0 and +1) optimized by Priroda and ADF codes, along with formal shortness ratio (FSR)<sup>b</sup>.

|                                      | Appr.s             | An-C(t) <sup>c</sup> | An-N  | An-Ar <sub>cent</sub> <sup>d</sup> | An-Pl <sub>cent</sub> <sup>d</sup> | FSR <sub>An-C(t)</sub> | FSR <sub>An-N</sub> |
|--------------------------------------|--------------------|----------------------|-------|------------------------------------|------------------------------------|------------------------|---------------------|
| [AcL <sub>2</sub> ]                  | Pri                | 2.926                | 2.756 | 2.658                              | 2.669                              | 1.005                  | 0.960               |
| [ThL <sub>2</sub> ]                  | Pri                | 2.838                | 2.726 | 2.561                              | 2.540                              | 1.013                  | 0.988               |
| [PaL <sub>2</sub> ]                  | Pri                | 2.768                | 2.708 | 2.460                              | 2.543                              | 0.999                  | 0.992               |
| [UL <sub>2</sub> ]                   | Pri                | 2.786                | 2.716 | 2.484                              | 2.530                              | 1.013                  | 1.002               |
| [NpL <sub>2</sub> ]                  | Pri                | 2.801                | 2.697 | 2.586                              | 2.515                              | 1.015                  | 0.992               |
| [PuL <sub>2</sub> ]                  | Pri                | 2.763                | 2.646 | 2.906                              | 2.471                              | 0.997                  | 0.969               |
| [AcL <sub>2</sub> ] <sup>+</sup>     | Pri                | 2.911                | 2.692 | 2.812                              | 2.611                              | 1.055                  | 0.990               |
| [ThL <sub>2</sub> ] <sup>+</sup>     | Pri                | 2.864                | 2.641 | 2.556                              | 2.543                              | 1.081                  | 1.012               |
| [PaL <sub>2</sub> ] <sup>+</sup>     | Pri                | 2.832                | 2.640 | 2.534                              | 2.472                              | 1.081                  | 1.023               |
| [UL <sub>2</sub> ] <sup>+</sup>      | Pri                | 2.803                | 2.608 | 2.517                              | 2.486                              | 1.078                  | 1.019               |
| [NpL <sub>2</sub> ] <sup>+</sup>     | Pri                | 2.821                | 2.622 | 2.556                              | 2.472                              | 1.081                  | 1.020               |
| [PuL <sub>2</sub> ] <sup>+</sup>     | Pri                | 2.844                | 2.598 | 2.635                              | 2.470                              | 1.085                  | 1.007               |
| [AcL <sub>2</sub> ]                  | ADF                | 2.917                | 2.754 | 2.678                              | 2.684                              | 1.118                  | 1.072               |
| [ThL <sub>2</sub> ]                  | ADF                | 2.836                | 2.734 | 2.579                              | 2.553                              | 1.013                  | 0.990               |
| [PaL <sub>2</sub> ]                  | ADF                | 2.768                | 2.710 | 2.465                              | 2.549                              | 0.999                  | 0.993               |
| [UL <sub>2</sub> ]                   | ADF                | 2.780                | 2.724 | 2.486                              | 2.533                              | 1.011                  | 1.005               |
| [NpL <sub>2</sub> ]                  | ADF                | 2.750                | 2.652 | 2.807                              | 2.478                              | 1.118                  | 1.096               |
| [PuL <sub>2</sub> ]                  | ADF                | 2.761                | 2.654 | 2.933                              | 2.483                              | 1.118                  | 1.092               |
| [AcL <sub>2</sub> ] <sup>+</sup>     | ADF                | 2.897                | 2.688 | 2.850                              | 2.622                              | 1.110                  | 1.046               |
| [ThL <sub>2</sub> ] <sup>+</sup>     | ADF                | 2.801                | 2.654 | 2.769                              | 2.510                              | 1.057                  | 1.017               |
| [PaL <sub>2</sub> ] <sup>+</sup>     | ADF                | 2.818                | 2.645 | 2.538                              | 2.484                              | 1.075                  | 1.025               |
| [UL <sub>2</sub> ] <sup>+</sup>      | ADF                | 2.797                | 2.622 | 2.513                              | 2.488                              | 1.076                  | 1.024               |
| [NpL <sub>2</sub> ] <sup>+</sup>     | ADF                | 2.816                | 2.634 | 2.561                              | 2.485                              | 1.145                  | 1.088               |
| [PuL <sub>2</sub> ] <sup>+</sup>     | ADF                | 2.802                | 2.600 | 2.746                              | 2.460                              | 1.134                  | 1.070               |
| [UL <sub>2</sub> (BH <sub>4</sub> )] | Pri                | 2.850                | 2.454 | 2.501                              | —                                  | —                      | —                   |
|                                      | Expt. <sup>e</sup> | 2.845                | 2.464 | 2.591                              | —                                  | —                      | —                   |
| [UL <sub>2</sub> (I)]                | Pri                | 2.834                | 2.446 | 2.538                              | 3.650                              | —                      | —                   |
|                                      | Expt. <sup>e</sup> | 2.870                | 2.466 | 2.619                              | 3.663                              | —                      | —                   |

<sup>a</sup>. Average value.

<sup>b</sup>. FSR of a A-B bond is defined as  $FSR_{A-B} = D_{A-B}/(R_A + R_B)$ , where  $D_{A-B}$  is the optimized A-B bond length, and  $R_A$  and  $R_B$  values are the atomic radii. Pykkö's calculations<sup>12</sup> showed the An<sup>VI</sup> radius, Ac (1.86 Å), Th (1.75), Pa (1.72), U (1.70), Np (1.71) and Pu (1.72). Corresponding An<sup>III</sup> and An<sup>II</sup> radius are obtained by adding 0.15 and 0.30 Å, respectively. And radii of C and N are 0.75 and 0.71 Å, respectively.

<sup>c</sup>. The C(t) atoms are marked in Chart 1b.

<sup>d</sup>. The distance was determined between the actinide and the centroid of planar Ar or Pl, where the subscript "cent" stands for the centroid of the cycle.

<sup>e</sup>. Experimental values from Refs.<sup>10, 11</sup>.

**Table S9.** Calculated reaction energies (in eV) while using the graphite potassium as reductant.

| An = | $[\text{AnL}^2]^+ + [\text{K}(\text{C}_{24}\text{H}_{12})] = [\text{AnL}^2] + [\text{K}(\text{C}_{24}\text{H}_{12})]^+$ |                |              |                          |                             |
|------|-------------------------------------------------------------------------------------------------------------------------|----------------|--------------|--------------------------|-----------------------------|
|      | $\Delta_r E$                                                                                                            | $\Delta_r E_0$ | $\Delta_r G$ | $\Delta_r G(\text{sol})$ | $\Delta_r G(\text{sol-so})$ |
| Ac   | 0.63                                                                                                                    | 0.56           | 0.53         | 0.65                     | 0.62                        |
| Th   | 0.32                                                                                                                    | 0.30           | 0.21         | 0.34                     | 0.34                        |
| Pa   | 0.09                                                                                                                    | 0.09           | 0.05         | 0.17                     | 0.13                        |
| U    | -0.01                                                                                                                   | -0.01          | -0.06        | 0.08                     | 0.10                        |
| Np   | 0.45                                                                                                                    | 0.40           | 0.31         | 0.46                     | 0.41                        |
| Pu   | -0.31                                                                                                                   | -0.29          | -0.34        | -0.15                    | -0.07                       |

## References:

1. F.-S. Guo, N. Tsoureas, G.-Z. Huang, M.-L. Tong, A. Mansikkamaeki and R. A. Layfield, *Angew. Chem. Int. Ed.*, 2020, **59**, 2299-2303.
2. N. Kaltsoyannis, *Inorg. Chem.*, 2013, **52**, 3407-3413.
3. Y.-L. Wang, H.-S. Hu, W.-L. Li, F. Wei and J. Li, *J. Am. Chem. Soc.*, 2016, **138**, 1126-1129.
4. Y.-J. Zhang, J.-H. Lan, L. Wang, Q.-Y. Wu, C.-Z. Wang, T. Bo, Z.-F. Chai and W.-Q. Shi, *J. Hazard. Mater.*, 2016, **308**, 402-410.
5. Q. Y. Wu, J. H. Lan, C. Z. Wang, Z. P. Cheng, Z. F. Chai, J. K. Gibson and W. Q. Shi, *Dalton Trans.*, 2016, **45**, 3102-3110.
6. H.-S. Hu, F. Wei, X. Wang, L. Andrews and J. Li, *J. Am. Chem. Soc.*, 2014, **136**, 1427-1437.
7. Z. Bao, H.-B. Zhao, N. Qu, G. Schreckenbach and Q.-J. Pan, *Dalton Trans.*, 2016, **45**, 15970-15982.
8. H.-B. Zhao, M. Zheng, G. Schreckenbach and Q.-J. Pan, *Dalton Trans.*, 2018, **47**, 2148-2151.
9. J.-N. Tian, M. Zheng, L. Li, G. Schreckenbach, Y.-R. Guo and Q.-J. Pan, *New J. Chem.*, 2019, **43**, 1469-1477.
10. P. L. Arnold, C. J. Stevens, J. H. Farnaby, M. G. Gardiner, G. S. Nichol and J. B. Love, *J. Am. Chem. Soc.*, 2014, **136**, 10218-10221.
11. P. L. Arnold, J. H. Farnaby, R. C. White, N. Kaltsoyannis, M. G. Gardiner and J. B. Love, *Chem. Sci.*, 2014, **5**, 756-765.
12. P. Pyykko, *J. Phys. Chem. A*, 2015, **119**, 2326-2337.

## Optimized Cartesian coordinates of all complexes by Priroda code

[AcL<sup>2</sup>]

Total energy: -27076.22910491 Hartree

|   |             |             |             |
|---|-------------|-------------|-------------|
| C | 0.23197664  | -0.33130315 | 0.34551596  |
| C | 0.28270448  | -1.00057038 | 1.58829518  |
| C | 1.35195126  | -0.16904257 | -0.69665060 |
| N | -1.06974238 | 0.02733426  | 0.04798041  |
| H | 1.16471246  | -1.38040566 | 2.10430725  |
| C | -1.04851284 | -1.02308195 | 2.08624150  |
| C | 1.12144809  | -1.33854496 | -1.68263221 |
| C | 1.22935904  | 1.20205199  | -1.38945499 |
| C | 2.73541608  | -0.24580344 | -0.02803288 |
| C | -1.84553580 | -0.36647375 | 1.12257912  |
| H | -1.36383734 | -1.42340472 | 3.04998206  |
| C | 0.17254063  | -1.20090871 | -2.74814393 |
| C | 1.56277797  | -2.64547656 | -1.38106141 |
| H | 1.93336788  | 1.27717441  | -2.23473863 |
| H | 1.46358635  | 1.99776024  | -0.66415629 |
| H | 0.20580471  | 1.38350357  | -1.74544952 |
| H | 3.52843997  | -0.17719134 | -0.79039344 |
| H | 2.89218115  | -1.17541634 | 0.53987197  |
| H | 2.85185285  | 0.59160640  | 0.67774541  |
| C | -3.37861225 | -0.24892138 | 1.07277017  |
| C | -3.81718907 | -1.42172039 | 0.16438031  |
| C | -3.91336022 | -2.73806038 | 0.66659216  |
| C | 1.04911646  | -3.81181928 | -1.98934013 |
| N | -1.23083999 | -5.42722544 | -0.62979626 |
| C | -0.28047504 | -2.33781255 | -3.42876313 |
| H | -0.18842047 | -0.21542703 | -3.04203873 |
| H | 2.24652265  | -2.77004761 | -0.53745964 |
| C | -3.78126419 | 1.11757924  | 0.48499839  |
| C | -3.98108397 | -0.35948297 | 2.48404731  |
| C | -3.80525869 | -1.26742969 | -1.26065180 |
| H | -3.87201696 | -2.87388053 | 1.75034652  |
| C | -3.89007799 | -3.89489209 | -0.14272182 |
| C | 1.20412305  | -5.19774238 | -1.31996160 |
| C | 0.10217596  | -3.63028139 | -3.04999662 |
| C | -1.99015969 | -5.26523397 | 0.51442444  |
| C | 0.08754232  | -5.23015242 | -0.26217557 |
| H | -0.99358289 | -2.21501839 | -4.25110361 |
| H | -4.86895653 | 1.16252075  | 0.30985411  |
| H | -3.24827142 | 1.32552590  | -0.45308866 |
| H | -3.50560164 | 1.91379818  | 1.19501027  |

|    |             |             |             |
|----|-------------|-------------|-------------|
| H  | -5.08129122 | -0.32285997 | 2.42961128  |
| H  | -3.63069234 | 0.48170306  | 3.10257266  |
| H  | -3.69921756 | -1.28710279 | 3.00496496  |
| C  | -3.87555567 | -2.39744408 | -2.08442281 |
| H  | -3.75556157 | -0.27480478 | -1.70796208 |
| C  | -3.87652672 | -3.69677476 | -1.56229329 |
| C  | -3.52710497 | -5.27757153 | 0.44845262  |
| C  | 1.00770382  | -6.34908501 | -2.32533739 |
| C  | 2.58460258  | -5.36647264 | -0.66213401 |
| H  | -0.31240311 | -4.49179943 | -3.57323144 |
| C  | -1.16339737 | -4.91324052 | 1.60405827  |
| C  | 0.16790205  | -4.89070757 | 1.10644195  |
| H  | -3.88082946 | -2.26230341 | -3.17141563 |
| H  | -3.88089991 | -4.55115813 | -2.23893884 |
| C  | -4.00425860 | -6.43329781 | -0.45242279 |
| C  | -4.13228947 | -5.48024380 | 1.84828752  |
| H  | 1.19042976  | -7.30975142 | -1.81759401 |
| H  | 1.71218266  | -6.25638109 | -3.16848488 |
| H  | -0.02206321 | -6.37885720 | -2.70748853 |
| H  | 2.64718368  | -6.35591367 | -0.18252001 |
| H  | 2.79048441  | -4.61394260 | 0.11413406  |
| H  | 3.37806460  | -5.29296648 | -1.42357690 |
| H  | -1.46200575 | -4.74413824 | 2.63881083  |
| H  | 1.06671347  | -4.70148093 | 1.69364195  |
| H  | -3.78046533 | -7.39348396 | 0.03955239  |
| H  | -3.47750806 | -6.43636461 | -1.41670780 |
| H  | -5.09143547 | -6.37082688 | -0.62539652 |
| H  | -3.80072949 | -4.72599183 | 2.57798357  |
| H  | -3.83586167 | -6.46593304 | 2.24007127  |
| H  | -5.23234227 | -5.43848728 | 1.79452288  |
| Ac | -1.21759989 | -2.67648285 | -0.46967805 |

[ThL<sup>2</sup>]

Total energy: -27821.21025124 Hartree

|   |             |             |             |
|---|-------------|-------------|-------------|
| C | 0.23659738  | -0.40434199 | 0.36148671  |
| C | 0.27329199  | -1.19134083 | 1.53782257  |
| C | 1.32430442  | -0.18400084 | -0.68607508 |
| N | -1.05295766 | -0.00815754 | 0.08969648  |
| H | 1.14830454  | -1.61689422 | 2.02720852  |
| C | -1.06651501 | -1.21386310 | 2.03959802  |
| C | 1.01582049  | -1.34344552 | -1.64671733 |
| C | 1.17204098  | 1.19508990  | -1.35081947 |
| C | 2.72963453  | -0.27288645 | -0.06901143 |

|   |             |             |             |
|---|-------------|-------------|-------------|
| C | -1.83453706 | -0.43931224 | 1.13707383  |
| H | -1.39206787 | -1.65962670 | 2.97850334  |
| C | 0.02316327  | -1.20955827 | -2.65796560 |
| C | 1.48494931  | -2.64793597 | -1.34527996 |
| H | 1.84856207  | 1.28117201  | -2.21715033 |
| H | 1.42810678  | 1.98290708  | -0.62414304 |
| H | 0.13815533  | 1.37717206  | -1.67373590 |
| H | 3.49700202  | -0.21174672 | -0.85790463 |
| H | 2.89772754  | -1.20105533 | 0.49709171  |
| H | 2.87707577  | 0.56610816  | 0.62947903  |
| C | -3.34864518 | -0.26300362 | 1.06364130  |
| C | -3.71258546 | -1.42302137 | 0.12337867  |
| C | -3.82814426 | -2.73789014 | 0.64351384  |
| C | 0.94297829  | -3.81043617 | -1.95110471 |
| N | -1.21235190 | -5.40647687 | -0.57975696 |
| C | -0.43839850 | -2.34366588 | -3.34772201 |
| H | -0.35662608 | -0.22341199 | -2.92647567 |
| H | 2.25094514  | -2.76488085 | -0.58029430 |
| C | -3.71128414 | 1.11267628  | 0.47800404  |
| C | -4.00043096 | -0.38722294 | 2.45048861  |
| C | -3.63435961 | -1.26993283 | -1.28938069 |
| H | -3.89780842 | -2.87010423 | 1.72206408  |
| C | -3.78586182 | -3.88960928 | -0.18369971 |
| C | 1.17725465  | -5.18473835 | -1.30406923 |
| C | -0.05000225 | -3.63640164 | -2.95606328 |
| C | -1.97616518 | -5.19908410 | 0.54594888  |
| C | 0.09568128  | -5.16398272 | -0.22760079 |
| H | -1.18087071 | -2.22382473 | -4.14154111 |
| H | -4.79251846 | 1.16895413  | 0.26961292  |
| H | -3.14940600 | 1.32215983  | -0.44217805 |
| H | -3.45086488 | 1.90042521  | 1.20324079  |
| H | -5.09852494 | -0.35773524 | 2.35944053  |
| H | -3.67824548 | 0.45454360  | 3.08385755  |
| H | -3.72810460 | -1.31385878 | 2.97717309  |
| C | -3.70763365 | -2.39652428 | -2.12625368 |
| H | -3.55366939 | -0.27561319 | -1.72943931 |
| C | -3.70568539 | -3.69624293 | -1.59141799 |
| C | -3.49730433 | -5.26381911 | 0.44122140  |
| C | 0.95179069  | -6.34910026 | -2.28403502 |
| C | 2.58038581  | -5.32953794 | -0.69271080 |
| H | -0.48494730 | -4.50384460 | -3.45320734 |
| C | -1.17199558 | -4.71388777 | 1.60537444  |
| C | 0.16829474  | -4.69131758 | 1.10499917  |
| H | -3.67439119 | -2.26243483 | -3.21100737 |

|    |             |             |             |
|----|-------------|-------------|-------------|
| H  | -3.67979634 | -4.55540547 | -2.26223419 |
| C  | -3.93418805 | -6.43060913 | -0.46138024 |
| C  | -4.15201548 | -5.44558617 | 1.82032214  |
| H  | 1.15628264  | -7.30373323 | -1.77295196 |
| H  | 1.62954954  | -6.26021484 | -3.14913635 |
| H  | -0.08801310 | -6.38716716 | -2.63569398 |
| H  | 2.67429557  | -6.32064147 | -0.22108957 |
| H  | 2.79647476  | -4.57873760 | 0.08176310  |
| H  | 3.34927051  | -5.24004271 | -1.47741636 |
| H  | -1.47881529 | -4.49260577 | 2.62670883  |
| H  | 1.06242626  | -4.44939318 | 1.67791974  |
| H  | -3.72555404 | -7.38579238 | 0.04697632  |
| H  | -3.37803239 | -6.44046626 | -1.40843252 |
| H  | -5.01517187 | -6.37129687 | -0.67022068 |
| H  | -3.83091316 | -4.69365243 | 2.55630598  |
| H  | -3.88414808 | -6.43410897 | 2.22603043  |
| H  | -5.24920838 | -5.38812030 | 1.73177716  |
| Th | -1.19157831 | -2.68594606 | -0.40177429 |

[PaL<sup>2</sup>]

Total energy: -28580.83728077 Hartree

|   |             |             |             |
|---|-------------|-------------|-------------|
| C | 0.23810738  | -0.44724420 | 0.37379881  |
| C | 0.27031473  | -1.25287652 | 1.53548649  |
| C | 1.30943552  | -0.19775431 | -0.68277794 |
| N | -1.04503485 | -0.03654112 | 0.11141469  |
| H | 1.14147081  | -1.70242933 | 2.00972203  |
| C | -1.06754037 | -1.27604715 | 2.03519379  |
| C | 0.96574853  | -1.34204179 | -1.64701127 |
| C | 1.14442524  | 1.19161488  | -1.32113442 |
| C | 2.72727288  | -0.29783496 | -0.09711283 |
| C | -1.82877046 | -0.48248741 | 1.14617489  |
| H | -1.40043964 | -1.74621856 | 2.95931240  |
| C | -0.04390380 | -1.20524568 | -2.62443497 |
| C | 1.41575918  | -2.64834517 | -1.32223181 |
| H | 1.81452477  | 1.29527491  | -2.19044334 |
| H | 1.40217980  | 1.96873811  | -0.58361128 |
| H | 0.10790892  | 1.37372462  | -1.63441780 |
| H | 3.47823879  | -0.24225935 | -0.90200929 |
| H | 2.90197804  | -1.22577353 | 0.46689570  |
| H | 2.89576994  | 0.54098215  | 0.59680325  |
| C | -3.33720849 | -0.27631151 | 1.05393462  |
| C | -3.67636489 | -1.42068671 | 0.08823527  |
| C | -3.76389370 | -2.73597401 | 0.61433988  |

|   |             |             |             |
|---|-------------|-------------|-------------|
| C | 0.89319096  | -3.80726216 | -1.95334158 |
| N | -1.20295546 | -5.38224635 | -0.55299447 |
| C | -0.56995014 | -2.34820960 | -3.26764431 |
| H | -0.43868621 | -0.22022542 | -2.87516885 |
| H | 2.18367554  | -2.76548125 | -0.56144052 |
| C | -3.67221864 | 1.11011842  | 0.47894630  |
| C | -4.01968976 | -0.41144027 | 2.42477735  |
| C | -3.55998221 | -1.26511330 | -1.31022214 |
| H | -3.84064707 | -2.86712264 | 1.69096797  |
| C | -3.74903984 | -3.88595786 | -0.21731092 |
| C | 1.16283304  | -5.17041399 | -1.30044603 |
| C | -0.11554800 | -3.64222471 | -2.92730095 |
| C | -1.96645952 | -5.15991956 | 0.56580208  |
| C | 0.10024706  | -5.12497660 | -0.20726060 |
| H | -1.31936487 | -2.22871855 | -4.05180313 |
| H | -4.75086129 | 1.18445692  | 0.26335288  |
| H | -3.10111472 | 1.31904752  | -0.43530579 |
| H | -3.40582018 | 1.88748641  | 1.21313470  |
| H | -5.11568311 | -0.38678588 | 2.31036089  |
| H | -3.71633175 | 0.42972200  | 3.06816829  |
| H | -3.75430673 | -1.33777624 | 2.95502892  |
| C | -3.55100109 | -2.39922487 | -2.15314500 |
| H | -3.45605563 | -0.27173465 | -1.74769696 |
| C | -3.63193137 | -3.70217503 | -1.61228098 |
| C | -3.48363755 | -5.24899201 | 0.43754777  |
| C | 0.92211178  | -6.34999752 | -2.25737432 |
| C | 2.57974025  | -5.29905186 | -0.71809875 |
| H | -0.56483927 | -4.51148184 | -3.40845615 |
| C | -1.16614630 | -4.65574160 | 1.61683453  |
| C | 0.17139975  | -4.63311065 | 1.11651430  |
| H | -3.50363363 | -2.26651130 | -3.23524906 |
| H | -3.58269075 | -4.56315750 | -2.27956228 |
| C | -3.89504906 | -6.43168718 | -0.45522707 |
| C | -4.16625362 | -5.41267572 | 1.80522807  |
| H | 1.12760433  | -7.29711918 | -1.73291346 |
| H | 1.59262860  | -6.27822139 | -3.12956837 |
| H | -0.12050124 | -6.38902452 | -2.59948972 |
| H | 2.69402797  | -6.29020623 | -0.25110488 |
| H | 2.80398315  | -4.54863718 | 0.05409614  |
| H | 3.33210335  | -5.20010975 | -1.51750201 |
| H | -1.47737976 | -4.40880395 | 2.63077425  |
| H | 1.06402397  | -4.36576454 | 1.68013375  |
| H | -3.67794585 | -7.37848909 | 0.06511362  |
| H | -3.33213442 | -6.44387369 | -1.39787487 |

|    |             |             |             |
|----|-------------|-------------|-------------|
| H  | -4.97504773 | -6.38943774 | -0.67268765 |
| H  | -3.85081404 | -4.66062238 | 2.54320390  |
| H  | -3.91684890 | -6.40149575 | 2.22183483  |
| H  | -5.26101554 | -5.34477858 | 1.69672798  |
| Pa | -1.21593427 | -2.67717624 | -0.46557227 |

[UL<sup>2</sup>]

Total energy: -29355.05543933 Hartree

|   |             |             |             |
|---|-------------|-------------|-------------|
| C | 0.23339917  | -0.44228029 | 0.37018735  |
| C | 0.26833298  | -1.24585802 | 1.53260135  |
| C | 1.31094641  | -0.19909363 | -0.68350182 |
| N | -1.04710737 | -0.02532737 | 0.10604571  |
| H | 1.14055972  | -1.69135653 | 2.00864426  |
| C | -1.06809421 | -1.26844655 | 2.03201146  |
| C | 0.97014833  | -1.34516331 | -1.64740551 |
| C | 1.15216182  | 1.18888369  | -1.32688777 |
| C | 2.72570539  | -0.30124289 | -0.09079581 |
| C | -1.82766178 | -0.47700870 | 1.14045660  |
| H | -1.40082537 | -1.73420304 | 2.95841694  |
| C | -0.03476481 | -1.20662524 | -2.62993421 |
| C | 1.43051583  | -2.64693591 | -1.33858679 |
| H | 1.82391358  | 1.28932516  | -2.19534300 |
| H | 1.41135107  | 1.96632767  | -0.59032000 |
| H | 0.11621716  | 1.37347535  | -1.64038365 |
| H | 3.48161428  | -0.24877026 | -0.89133586 |
| H | 2.89504257  | -1.22783935 | 0.47708001  |
| H | 2.89156939  | 0.53878612  | 0.60211528  |
| C | -3.33870507 | -0.27754305 | 1.05414177  |
| C | -3.67981473 | -1.42393640 | 0.09075980  |
| C | -3.78556515 | -2.73513809 | 0.61181267  |
| C | 0.89754369  | -3.80465972 | -1.95303536 |
| N | -1.20547300 | -5.39327804 | -0.56018155 |
| C | -0.55226780 | -2.34806767 | -3.27283504 |
| H | -0.42888347 | -0.22162787 | -2.88112866 |
| H | 2.19365129  | -2.76468182 | -0.57230655 |
| C | -3.68179587 | 1.10713512  | 0.47912763  |
| C | -4.01442394 | -0.41443774 | 2.42818334  |
| C | -3.57042884 | -1.26697462 | -1.30846291 |
| H | -3.85544877 | -2.86660376 | 1.68943646  |
| C | -3.75224256 | -3.88353016 | -0.21400288 |
| C | 1.16414166  | -5.16936680 | -1.30094847 |
| C | -0.10661578 | -3.64014470 | -2.93231011 |
| C | -1.96552581 | -5.16356773 | 0.55913404  |
| C | 0.09525115  | -5.12867056 | -0.21180599 |



|   |             |             |             |
|---|-------------|-------------|-------------|
| H | -1.30840766 | -2.22893279 | -4.05181793 |
| H | -4.76086586 | 1.17786554  | 0.26433231  |
| H | -3.11044993 | 1.31868069  | -0.43434902 |
| H | -3.41796181 | 1.88485590  | 1.21375793  |
| H | -5.11118542 | -0.39356526 | 2.32004022  |
| H | -3.71030180 | 0.42831168  | 3.06894037  |
| H | -3.74213835 | -1.33895979 | 2.95815163  |
| C | -3.56790469 | -2.39989529 | -2.14543891 |
| H | -3.46734165 | -0.27366455 | -1.74591385 |
| C | -3.64216598 | -3.70058415 | -1.60999569 |
| C | -3.48497555 | -5.24802259 | 0.43821953  |
| C | 0.92933633  | -6.34644433 | -2.26269787 |
| C | 2.57825420  | -5.29771215 | -0.71175271 |
| H | -0.55538101 | -4.50920902 | -3.41395848 |
| C | -1.16729612 | -4.66007827 | 1.61147935  |
| C | 0.16894586  | -4.63753218 | 1.11162479  |
| H | -3.51269205 | -2.26738542 | -3.22808736 |
| H | -3.59383579 | -4.56143294 | -2.27726677 |
| C | -3.90394858 | -6.42852160 | -0.45424621 |
| C | -4.16085177 | -5.41131882 | 1.80929052  |
| H | 1.13708691  | -7.29399755 | -1.74008678 |
| H | 1.60059085  | -6.27093050 | -3.13405492 |
| H | -0.11324364 | -6.38801666 | -2.60453138 |
| H | 2.69007315  | -6.28984270 | -0.24649919 |
| H | 2.79723379  | -4.54957018 | 0.06417978  |
| H | 3.33546426  | -5.19671551 | -1.50638967 |
| H | -1.47866731 | -4.41677661 | 2.62623440  |
| H | 1.06235128  | -4.37373759 | 1.67564892  |
| H | -3.68925572 | -7.37578785 | 0.06607111  |
| H | -3.34105202 | -6.44302609 | -1.39683869 |
| H | -4.98414321 | -6.38295393 | -0.67026093 |
| H | -3.83897416 | -4.66125302 | 2.54654322  |
| H | -3.91046847 | -6.40100176 | 2.22296800  |
| H | -5.25622500 | -5.34168600 | 1.70768899  |
| U | -1.20599569 | -2.68079369 | -0.43899514 |

[NpL<sup>2</sup>]

Total energy: -30144.61423008 Hartree

|   |             |             |             |
|---|-------------|-------------|-------------|
| C | 0.23256724  | -0.42373766 | 0.36383837  |
| C | 0.27511552  | -1.19036256 | 1.54926579  |
| C | 1.31838082  | -0.19359629 | -0.68680760 |
| N | -1.05494325 | -0.03472569 | 0.08470630  |
| H | 1.15121740  | -1.61150759 | 2.04095660  |
| C | -1.06258620 | -1.21310335 | 2.04960763  |

|   |             |             |             |
|---|-------------|-------------|-------------|
| C | 1.00739475  | -1.34640866 | -1.65552477 |
| C | 1.16018754  | 1.19025775  | -1.34073123 |
| C | 2.72726359  | -0.28378642 | -0.07684858 |
| C | -1.83108685 | -0.45877517 | 1.13574537  |
| H | -1.38811894 | -1.65477354 | 2.99069498  |
| C | 0.05401083  | -1.20593979 | -2.68625329 |
| C | 1.45021200  | -2.64851054 | -1.33153481 |
| H | 1.83635447  | 1.28984294  | -2.20588128 |
| H | 1.41256917  | 1.97184619  | -0.60629958 |
| H | 0.12461745  | 1.36925264  | -1.65957674 |
| H | 3.49174799  | -0.21992118 | -0.86834020 |
| H | 2.89904959  | -1.21219324 | 0.48745055  |
| H | 2.87666180  | 0.55397960  | 0.62241387  |
| C | -3.34602604 | -0.27252399 | 1.05794893  |
| C | -3.71302780 | -1.42586941 | 0.10966214  |
| C | -3.79566490 | -2.73703057 | 0.62973191  |
| C | 0.93526342  | -3.80441826 | -1.96018227 |
| N | -1.21245320 | -5.37860277 | -0.57847435 |
| C | -0.44241530 | -2.34376832 | -3.34174602 |
| H | -0.32932773 | -0.22029582 | -2.95173831 |
| H | 2.17380449  | -2.76939498 | -0.52685208 |
| C | -3.69666719 | 1.10838088  | 0.47669350  |
| C | -4.00558542 | -0.39817183 | 2.44154347  |
| C | -3.67483906 | -1.26811623 | -1.29198780 |
| H | -3.80958082 | -2.87079921 | 1.71030103  |
| C | -3.78562040 | -3.88376184 | -0.19568364 |
| C | 1.17190077  | -5.17466808 | -1.30398487 |
| C | -0.01710258 | -3.63389263 | -2.98723627 |
| C | -1.97060650 | -5.17995063 | 0.54964506  |
| C | 0.09333913  | -5.14518857 | -0.22152984 |
| H | -1.18393208 | -2.22352101 | -4.13660951 |
| H | -4.77722021 | 1.17875381  | 0.26925102  |
| H | -3.13069223 | 1.31461264  | -0.44159855 |
| H | -3.42756688 | 1.88981344  | 1.20531615  |
| H | -5.10326168 | -0.36559602 | 2.34658060  |
| H | -3.68420030 | 0.44219395  | 3.07686876  |
| H | -3.73749639 | -1.32520966 | 2.96937856  |
| C | -3.69678249 | -2.39761192 | -2.12532980 |
| H | -3.58929777 | -0.27438159 | -1.73256023 |
| C | -3.74641936 | -3.69596860 | -1.59354954 |
| C | -3.49318390 | -5.25328033 | 0.43922404  |
| C | 0.93885027  | -6.34574758 | -2.27451724 |
| C | 2.57901378  | -5.31759662 | -0.70009742 |
| H | -0.45480742 | -4.50112631 | -3.48245142 |

|    |             |             |             |
|----|-------------|-------------|-------------|
| C  | -1.16653776 | -4.71804430 | 1.61489833  |
| C  | 0.17132795  | -4.69549815 | 1.11503185  |
| H  | -3.66282250 | -2.26385264 | -3.21025968 |
| H  | -3.71558454 | -4.55503478 | -2.26435742 |
| C  | -3.91902303 | -6.42739969 | -0.45954031 |
| C  | -4.15456735 | -5.43152424 | 1.81613455  |
| H  | 1.14012487  | -7.29609199 | -1.75460754 |
| H  | 1.61454854  | -6.27037152 | -3.14247662 |
| H  | -0.10293970 | -6.38131606 | -2.62023307 |
| H  | 2.67446152  | -6.30769989 | -0.22709382 |
| H  | 2.80001221  | -4.56621088 | 0.07220948  |
| H  | 3.34443330  | -5.23091522 | -1.48851034 |
| H  | -1.47314651 | -4.50156256 | 2.63755066  |
| H  | 1.06665353  | -4.45877325 | 1.68865415  |
| H  | -3.70109445 | -7.37752930 | 0.05398191  |
| H  | -3.35918788 | -6.43536456 | -1.40433843 |
| H  | -5.00027247 | -6.38207129 | -0.67031556 |
| H  | -3.83669884 | -4.67903591 | 2.55275745  |
| H  | -3.88758036 | -6.41906036 | 2.22433947  |
| H  | -5.25153829 | -5.37566300 | 1.72389193  |
| Np | -1.17954881 | -2.69016154 | -0.36998207 |

[PuL<sup>2</sup>]

Total energy: -30949.28890383 Hartree

|   |             |             |             |
|---|-------------|-------------|-------------|
| C | 0.14110546  | -0.44687479 | 0.32999319  |
| C | 0.24922514  | -1.10115950 | 1.57656726  |
| C | 1.19426967  | -0.19003789 | -0.74923826 |
| N | -1.16235729 | -0.08985074 | 0.08975365  |
| H | 1.15321460  | -1.48224444 | 2.05200485  |
| C | -1.06150131 | -1.10451796 | 2.14390861  |
| C | 1.04096716  | -1.33463668 | -1.76962155 |
| C | 0.95205467  | 1.19100671  | -1.38265117 |
| C | 2.61604795  | -0.21004211 | -0.14806677 |
| C | -1.88728671 | -0.43969996 | 1.20678878  |
| H | -1.33173915 | -1.46848296 | 3.13478360  |
| C | 0.72069901  | -1.17331246 | -3.12499797 |
| C | 1.18592043  | -2.64606691 | -1.28550056 |
| H | 1.69731488  | 1.39577250  | -2.16853892 |
| H | 1.04302437  | 1.96974106  | -0.60891500 |
| H | -0.05987890 | 1.26090939  | -1.80609057 |
| H | 3.36135044  | -0.03962692 | -0.94183218 |
| H | 2.85655804  | -1.17088562 | 0.33268681  |
| H | 2.71827407  | 0.58464505  | 0.60849379  |

|   |             |             |             |
|---|-------------|-------------|-------------|
| C | -3.41099124 | -0.28038191 | 1.17572145  |
| C | -3.78923713 | -1.43941572 | 0.23127264  |
| C | -3.93737760 | -2.74933151 | 0.75761788  |
| C | 0.96880156  | -3.78847811 | -2.07476915 |
| N | -1.31558806 | -5.32055901 | -0.55878850 |
| C | 0.54502137  | -2.29700551 | -3.94058688 |
| H | 0.59350922  | -0.17473029 | -3.54775694 |
| H | 1.47748459  | -2.78477012 | -0.23856619 |
| C | -3.80370305 | 1.09677294  | 0.61105845  |
| C | -4.01839619 | -0.42403213 | 2.57945866  |
| C | -3.64659359 | -1.29054234 | -1.16736456 |
| H | -4.06159447 | -2.87864903 | 1.83153429  |
| C | -3.86083852 | -3.89784118 | -0.07293881 |
| C | 1.04820558  | -5.15483647 | -1.36659083 |
| C | 0.64963567  | -3.59433437 | -3.42610785 |
| C | -2.02621688 | -5.21266471 | 0.61552215  |
| C | 0.00474754  | -5.10875351 | -0.24900233 |
| H | 0.29168054  | -2.15832025 | -4.99564302 |
| H | -4.89125908 | 1.14797565  | 0.43703834  |
| H | -3.27322813 | 1.31610546  | -0.32525135 |
| H | -3.52522197 | 1.88102268  | 1.33339715  |
| H | -5.11923025 | -0.41922922 | 2.52419875  |
| H | -3.69695722 | 0.42326035  | 3.20543587  |
| H | -3.70537783 | -1.34546108 | 3.09322813  |
| C | -3.62419733 | -2.41615147 | -2.00838839 |
| H | -3.49596997 | -0.29972733 | -1.59636879 |
| C | -3.71720105 | -3.70948568 | -1.46674140 |
| C | -3.55636101 | -5.27165892 | 0.55816539  |
| C | 0.72978914  | -6.32249679 | -2.31648600 |
| C | 2.46464535  | -5.36547368 | -0.78989313 |
| H | 0.46778543  | -4.44999524 | -4.07945090 |
| C | -1.16942469 | -4.84515105 | 1.67995280  |
| C | 0.14259012  | -4.78589885 | 1.11860398  |
| H | -3.51088371 | -2.28581909 | -3.08814381 |
| H | -3.62082011 | -4.57294802 | -2.12520019 |
| C | -4.02409338 | -6.44498433 | -0.32168639 |
| C | -4.16380711 | -5.43933940 | 1.95921103  |
| H | 0.77054225  | -7.27087640 | -1.75767202 |
| H | 1.46659662  | -6.37146880 | -3.13482701 |
| H | -0.28185663 | -6.22778338 | -2.73577069 |
| H | 2.51415690  | -6.32381680 | -0.24819440 |
| H | 2.75938250  | -4.56475979 | -0.09402565 |
| H | 3.20357166  | -5.38358875 | -1.60736251 |
| H | -1.42467763 | -4.71936888 | 2.73179455  |

|    |             |             |             |
|----|-------------|-------------|-------------|
| H  | 1.06406768  | -4.58519288 | 1.66545653  |
| H  | -3.79575197 | -7.39621297 | 0.18565576  |
| H  | -3.50141361 | -6.45967805 | -1.28748763 |
| H  | -5.11170683 | -6.38983516 | -0.49421353 |
| H  | -3.80094350 | -4.69081784 | 2.67963849  |
| H  | -3.89659693 | -6.43093827 | 2.35721959  |
| H  | -5.26263512 | -5.36645674 | 1.91286516  |
| Pu | -1.39929593 | -2.71859347 | -0.08766353 |

[AcL<sup>2</sup>]<sup>+</sup>

Total energy: -27076.08567549 Hartree

|   |             |             |             |
|---|-------------|-------------|-------------|
| C | 0.22758601  | -0.34196569 | 0.33134558  |
| C | 0.28598621  | -0.96522168 | 1.59503675  |
| C | 1.36069634  | -0.16373123 | -0.69951902 |
| N | -1.08056177 | -0.02802868 | 0.01610095  |
| H | 1.17338360  | -1.29479317 | 2.13519951  |
| C | -1.04885516 | -0.98752248 | 2.09389075  |
| C | 1.16440398  | -1.34267812 | -1.68664734 |
| C | 1.21886971  | 1.20411728  | -1.39372105 |
| C | 2.73847361  | -0.22276608 | -0.01537620 |
| C | -1.85159663 | -0.37684106 | 1.10833800  |
| H | -1.35467348 | -1.33732999 | 3.07977526  |
| C | 0.35383213  | -1.20032168 | -2.82924627 |
| C | 1.56625411  | -2.65188795 | -1.33398676 |
| H | 1.94384973  | 1.30194396  | -2.21755654 |
| H | 1.41879271  | 2.00053776  | -0.66056015 |
| H | 0.20171418  | 1.37013831  | -1.77517558 |
| H | 3.53700800  | -0.13341405 | -0.76866189 |
| H | 2.90986232  | -1.15127687 | 0.54968000  |
| H | 2.83466040  | 0.61427029  | 0.69258255  |
| C | -3.38752889 | -0.24350440 | 1.07447126  |
| C | -3.85200026 | -1.42736911 | 0.18822684  |
| C | -3.88368872 | -2.74382541 | 0.70400269  |
| C | 1.09117459  | -3.80932063 | -1.99328691 |
| N | -1.23749799 | -5.36706331 | -0.64547907 |
| C | -0.05808922 | -2.32796571 | -3.54976024 |
| H | 0.02197589  | -0.20976213 | -3.14446337 |
| H | 2.17540234  | -2.78167694 | -0.43571088 |
| C | -3.77605445 | 1.11963045  | 0.47118954  |
| C | -3.97749613 | -0.33438246 | 2.49346287  |
| C | -3.99556888 | -1.27470320 | -1.20421358 |
| H | -3.74866105 | -2.88104650 | 1.78000199  |
| C | -3.92418004 | -3.89439917 | -0.11733678 |

|    |             |             |             |
|----|-------------|-------------|-------------|
| C  | 1.21154609  | -5.20301694 | -1.32565961 |
| C  | 0.28128919  | -3.61986159 | -3.12957252 |
| C  | -1.99437636 | -5.25104366 | 0.50463613  |
| C  | 0.08445047  | -5.21598861 | -0.27322834 |
| H  | -0.68028166 | -2.19879475 | -4.44068573 |
| H  | -4.86587329 | 1.18547408  | 0.32351016  |
| H  | -3.26197467 | 1.31136770  | -0.48101277 |
| H  | -3.47214697 | 1.91838941  | 1.16501321  |
| H  | -5.07632260 | -0.27423196 | 2.44873048  |
| H  | -3.60900203 | 0.50638942  | 3.10043921  |
| H  | -3.71198767 | -1.26172317 | 3.02313735  |
| C  | -4.12517823 | -2.39814642 | -2.02981375 |
| H  | -3.98186551 | -0.27871948 | -1.64978645 |
| C  | -4.06664006 | -3.69449731 | -1.50389064 |
| C  | -3.53509813 | -5.28344529 | 0.45022244  |
| C  | 0.99381446  | -6.34874745 | -2.33211451 |
| C  | 2.58628963  | -5.39392271 | -0.65976046 |
| H  | -0.10642009 | -4.48171372 | -3.67509217 |
| C  | -1.16427953 | -4.94620429 | 1.60314311  |
| C  | 0.17052805  | -4.92379062 | 1.10371152  |
| H  | -4.24540399 | -2.26101210 | -3.10883846 |
| H  | -4.10725935 | -4.55082678 | -2.17898912 |
| C  | -3.99787275 | -6.43352474 | -0.46417249 |
| C  | -4.12921843 | -5.50686628 | 1.85273709  |
| H  | 1.14443966  | -7.31061609 | -1.81842246 |
| H  | 1.71560176  | -6.28262491 | -3.16187675 |
| H  | -0.02955130 | -6.35763337 | -2.73256126 |
| H  | 2.62802644  | -6.38203323 | -0.17707597 |
| H  | 2.81070084  | -4.64262723 | 0.11238432  |
| H  | 3.38239510  | -5.34525804 | -1.41929884 |
| H  | -1.45583131 | -4.83070598 | 2.64696616  |
| H  | 1.07194518  | -4.78756027 | 1.70102553  |
| H  | -3.74568752 | -7.39352347 | 0.01182166  |
| H  | -3.48931229 | -6.41697973 | -1.43824125 |
| H  | -5.08863722 | -6.39804517 | -0.61523293 |
| H  | -3.81393596 | -4.75375411 | 2.59055701  |
| H  | -3.81492864 | -6.49024216 | 2.23393223  |
| H  | -5.22932654 | -5.49003281 | 1.80249046  |
| Ac | -1.18005943 | -2.68982817 | -0.37110217 |

[ThL<sup>2</sup>]<sup>+</sup>

Total energy: -27821.05571051 Hartree

|   |            |             |            |
|---|------------|-------------|------------|
| C | 0.23526585 | -0.43206330 | 0.34774316 |
|---|------------|-------------|------------|

|   |             |             |             |
|---|-------------|-------------|-------------|
| C | 0.28147205  | -1.13555124 | 1.57115993  |
| C | 1.33055647  | -0.19583606 | -0.69537991 |
| N | -1.06759766 | -0.08783720 | 0.04797602  |
| H | 1.16190645  | -1.51951448 | 2.08625313  |
| C | -1.05311304 | -1.15804193 | 2.07090822  |
| C | 1.01337233  | -1.34451235 | -1.66887984 |
| C | 1.17947692  | 1.19192409  | -1.34375393 |
| C | 2.73240245  | -0.29997172 | -0.07465115 |
| C | -1.84244794 | -0.46709870 | 1.12575950  |
| H | -1.36703512 | -1.56217682 | 3.03321683  |
| C | -0.00169647 | -1.20702360 | -2.66338145 |
| C | 1.49066410  | -2.64112618 | -1.40185993 |
| H | 1.87244141  | 1.29457910  | -2.19405673 |
| H | 1.42148251  | 1.96937486  | -0.60269717 |
| H | 0.15260823  | 1.38039184  | -1.68483985 |
| H | 3.50117199  | -0.23595926 | -0.86070974 |
| H | 2.90050645  | -1.22919327 | 0.49052449  |
| H | 2.88417504  | 0.53569029  | 0.62542588  |
| C | -3.35987084 | -0.27527296 | 1.06075244  |
| C | -3.72574481 | -1.42411399 | 0.10462411  |
| C | -3.87323271 | -2.73151874 | 0.60394242  |
| C | 0.94067805  | -3.80381351 | -1.97272419 |
| N | -1.22207378 | -5.31790575 | -0.60005733 |
| C | -0.47835860 | -2.34493236 | -3.32825848 |
| H | -0.38093716 | -0.22136577 | -2.93294254 |
| H | 2.24672997  | -2.75959019 | -0.62401980 |
| C | -3.71291393 | 1.10950258  | 0.48899825  |
| C | -4.00572846 | -0.41510647 | 2.44805332  |
| C | -3.61627686 | -1.26667943 | -1.31018663 |
| H | -3.92999740 | -2.86444183 | 1.68554348  |
| C | -3.79884369 | -3.88316480 | -0.20138318 |
| C | 1.18380300  | -5.17125304 | -1.31031008 |
| C | -0.07375764 | -3.63613914 | -2.96326049 |
| C | -1.98229485 | -5.16832886 | 0.54247750  |
| C | 0.09603519  | -5.13319793 | -0.23380715 |
| H | -1.22264334 | -2.22496640 | -4.12120627 |
| H | -4.79651681 | 1.18220555  | 0.30387626  |
| H | -3.16850870 | 1.32531590  | -0.44017429 |
| H | -3.43190005 | 1.88706160  | 1.21605057  |
| H | -5.10314206 | -0.38257416 | 2.36080845  |
| H | -3.68519295 | 0.42293724  | 3.08556187  |
| H | -3.73372638 | -1.34296563 | 2.97363987  |
| C | -3.66011432 | -2.39661667 | -2.13804071 |
| H | -3.53560725 | -0.27299588 | -1.75072782 |

|    |             |             |             |
|----|-------------|-------------|-------------|
| C  | -3.68839301 | -3.69548085 | -1.61238744 |
| C  | -3.50766265 | -5.25051464 | 0.44172076  |
| C  | 0.95783134  | -6.34834421 | -2.27599538 |
| C  | 2.58451622  | -5.30258707 | -0.69223455 |
| H  | -0.50790761 | -4.50289703 | -3.46149332 |
| C  | -1.16193194 | -4.77536591 | 1.62248139  |
| C  | 0.17310417  | -4.75275670 | 1.12380273  |
| H  | -3.62245220 | -2.26267929 | -3.22328736 |
| H  | -3.66277826 | -4.55398271 | -2.28343210 |
| C  | -3.93368632 | -6.43011060 | -0.45070151 |
| C  | -4.15627282 | -5.41820287 | 1.82459061  |
| H  | 1.14894440  | -7.29541607 | -1.74807012 |
| H  | 1.65014164  | -6.28087340 | -3.13033158 |
| H  | -0.07561232 | -6.38849768 | -2.64572059 |
| H  | 2.68242022  | -6.29090064 | -0.21775984 |
| H  | 2.80157868  | -4.55030345 | 0.08113463  |
| H  | 3.35436259  | -5.21763265 | -1.47524798 |
| H  | -1.45963642 | -4.60028079 | 2.65623175  |
| H  | 1.07012383  | -4.55755479 | 1.71131446  |
| H  | -3.70372906 | -7.37707847 | 0.06168725  |
| H  | -3.39408775 | -6.44201382 | -1.40723217 |
| H  | -5.01798776 | -6.39310508 | -0.64226120 |
| H  | -3.83605307 | -4.66478984 | 2.56010521  |
| H  | -3.88973053 | -6.40401010 | 2.23523251  |
| H  | -5.25296718 | -5.36505138 | 1.73839376  |
| Th | -1.19758130 | -2.68378510 | -0.41589463 |

[PaL<sup>2</sup>]<sup>+</sup> Total energy: -28580.67413954 Hartree

|   |             |             |             |
|---|-------------|-------------|-------------|
| C | 0.22958624  | -0.46991373 | 0.34308080  |
| C | 0.26456181  | -1.26038227 | 1.51388292  |
| C | 1.32326145  | -0.19961316 | -0.68824827 |
| N | -1.06244752 | -0.09035423 | 0.06232942  |
| H | 1.14011711  | -1.67110140 | 2.01434812  |
| C | -1.07730402 | -1.28287384 | 2.01548090  |
| C | 0.99233080  | -1.34738589 | -1.65116304 |
| C | 1.15738032  | 1.18995781  | -1.32574479 |
| C | 2.72823638  | -0.29929494 | -0.07430477 |
| C | -1.84191527 | -0.50476838 | 1.11728415  |
| H | -1.39761160 | -1.71382154 | 2.96280854  |
| C | -0.01026097 | -1.20891347 | -2.64471242 |
| C | 1.46880552  | -2.64440151 | -1.36890173 |
| H | 1.84434765  | 1.30232045  | -2.17960932 |
| H | 1.39960540  | 1.96424371  | -0.58152875 |



|   |             |             |             |
|---|-------------|-------------|-------------|
| H | 0.12726184  | 1.37447941  | -1.65842306 |
| H | 3.49369496  | -0.22826337 | -0.86304133 |
| H | 2.90306598  | -1.22880258 | 0.48747188  |
| H | 2.87801989  | 0.53523351  | 0.62754578  |
| C | -3.35106828 | -0.27841879 | 1.05878768  |
| C | -3.69879815 | -1.42677238 | 0.10221264  |
| C | -3.83450844 | -2.73401435 | 0.61379190  |
| C | 0.91984320  | -3.80309865 | -1.95631222 |
| N | -1.21650481 | -5.31910967 | -0.58656001 |
| C | -0.49385606 | -2.34533710 | -3.30932412 |
| H | -0.39420068 | -0.22264893 | -2.90648015 |
| H | 2.23569225  | -2.76200651 | -0.60455192 |
| C | -3.68522685 | 1.10836003  | 0.48455712  |
| C | -4.00550810 | -0.41283047 | 2.44238189  |
| C | -3.59797110 | -1.27006097 | -1.30373956 |
| H | -3.90840469 | -2.86551090 | 1.69240752  |
| C | -3.77120864 | -3.88259192 | -0.20215408 |
| C | 1.17667553  | -5.16855895 | -1.30539808 |
| C | -0.08207655 | -3.63592794 | -2.94610144 |
| C | -1.97787642 | -5.13037927 | 0.54346365  |
| C | 0.09341233  | -5.09530567 | -0.23124059 |
| H | -1.24079611 | -2.22518328 | -4.09889876 |
| H | -4.76741588 | 1.19243290  | 0.29630417  |
| H | -3.13574391 | 1.31880869  | -0.44255608 |
| H | -3.39874257 | 1.88316235  | 1.21234254  |
| H | -5.10228465 | -0.37351203 | 2.34965022  |
| H | -3.68322808 | 0.42480496  | 3.07955592  |
| H | -3.74125694 | -1.34064679 | 2.97104239  |
| C | -3.63526025 | -2.39920575 | -2.13486753 |
| H | -3.50917251 | -0.27596302 | -1.74252014 |
| C | -3.66951073 | -3.69716959 | -1.60457017 |
| C | -3.49737655 | -5.24757523 | 0.44282532  |
| C | 0.93507761  | -6.34844208 | -2.26154375 |
| C | 2.58064846  | -5.30372176 | -0.69600444 |
| H | -0.52110070 | -4.50420365 | -3.43804251 |
| C | -1.17554561 | -4.64087461 | 1.59866996  |
| C | 0.16623208  | -4.61817327 | 1.09686552  |
| H | -3.59310453 | -2.26601564 | -3.21942442 |
| H | -3.63517749 | -4.55764242 | -2.27319130 |
| C | -3.90766028 | -6.43048877 | -0.44997022 |
| C | -4.15234925 | -5.41711675 | 1.82235642  |
| H | 1.12408047  | -7.29371983 | -1.72974766 |
| H | 1.62242496  | -6.29014300 | -3.12051301 |
| H | -0.10069202 | -6.38497139 | -2.62448200 |

|    |             |             |             |
|----|-------------|-------------|-------------|
| H  | 2.67660811  | -6.29169066 | -0.22040025 |
| H  | 2.80526697  | -4.55145001 | 0.07457150  |
| H  | 3.34628369  | -5.22430934 | -1.48376048 |
| H  | -1.47683488 | -4.43647675 | 2.62492174  |
| H  | 1.06067592  | -4.39368888 | 1.67592939  |
| H  | -3.67340818 | -7.37490045 | 0.06507516  |
| H  | -3.36363893 | -6.44063375 | -1.40380996 |
| H  | -4.99127446 | -6.40199821 | -0.64655596 |
| H  | -3.83835522 | -4.66319182 | 2.55933186  |
| H  | -3.88359416 | -6.40211255 | 2.23347962  |
| H  | -5.24890046 | -5.36899333 | 1.73106853  |
| Pa | -1.19399588 | -2.68520809 | -0.40679460 |

[UL<sup>2</sup>]<sup>+</sup> Total energy: -29354.88866568 Hartree

|   |             |             |             |
|---|-------------|-------------|-------------|
| C | 0.23349349  | -0.48681756 | 0.35141885  |
| C | 0.27262681  | -1.24823171 | 1.53689087  |
| C | 1.31708199  | -0.20837002 | -0.68925337 |
| N | -1.06202825 | -0.12507192 | 0.06176010  |
| H | 1.14982093  | -1.65303124 | 2.03971500  |
| C | -1.06811641 | -1.27087220 | 2.03809458  |
| C | 0.98081214  | -1.34798800 | -1.66047216 |
| C | 1.14289903  | 1.18682328  | -1.31282427 |
| C | 2.72836768  | -0.30864757 | -0.08893978 |
| C | -1.83861901 | -0.52184878 | 1.12599894  |
| H | -1.38796228 | -1.69601474 | 2.98841526  |
| C | -0.01413097 | -1.20884412 | -2.65352952 |
| C | 1.44133478  | -2.64474909 | -1.35948969 |
| H | 1.82977553  | 1.31145720  | -2.16505247 |
| H | 1.38059417  | 1.95533584  | -0.56121769 |
| H | 0.11213294  | 1.36845800  | -1.64494691 |
| H | 3.48631518  | -0.23515632 | -0.88455087 |
| H | 2.90952865  | -1.23885835 | 0.46947378  |
| H | 2.88402286  | 0.52469772  | 0.61296804  |
| C | -3.34678201 | -0.28719876 | 1.05421588  |
| C | -3.69627391 | -1.42705004 | 0.08793456  |
| C | -3.80782259 | -2.73344061 | 0.60286714  |
| C | 0.90844021  | -3.79970627 | -1.96477856 |
| N | -1.21418398 | -5.28546834 | -0.57837208 |
| C | -0.51611704 | -2.34519509 | -3.30742890 |
| H | -0.40120771 | -0.22222372 | -2.91068226 |
| H | 2.19698658  | -2.76319667 | -0.58489983 |
| C | -3.66541945 | 1.10565216  | 0.48488407  |
| C | -4.01457883 | -0.42277431 | 2.43183551  |

|   |             |             |             |
|---|-------------|-------------|-------------|
| C | -3.60124898 | -1.26957344 | -1.31262794 |
| H | -3.86637781 | -2.86552070 | 1.68182840  |
| C | -3.76848604 | -3.87883049 | -0.21615158 |
| C | 1.17095983  | -5.15956105 | -1.30375965 |
| C | -0.08572795 | -3.63403628 | -2.95453034 |
| C | -1.97395079 | -5.11612980 | 0.55617909  |
| C | 0.09805390  | -5.08116214 | -0.21866757 |
| H | -1.25988995 | -2.22499673 | -4.09895389 |
| H | -4.74625028 | 1.20112191  | 0.29430180  |
| H | -3.11171612 | 1.31351318  | -0.44031064 |
| H | -3.37326280 | 1.87496559  | 1.21620224  |
| H | -5.11032710 | -0.38160190 | 2.32925365  |
| H | -3.69703333 | 0.41374109  | 3.07274417  |
| H | -3.75661194 | -1.35137008 | 2.96202151  |
| C | -3.61771264 | -2.39784120 | -2.14788221 |
| H | -3.50725470 | -0.27488425 | -1.74981377 |
| C | -3.67261160 | -3.69485890 | -1.61343247 |
| C | -3.49264913 | -5.23831029 | 0.44018156  |
| C | 0.92029773  | -6.34767151 | -2.24784651 |
| C | 2.58140692  | -5.29114911 | -0.70753735 |
| H | -0.52761070 | -4.50375584 | -3.44208037 |
| C | -1.16775024 | -4.65839122 | 1.61785670  |
| C | 0.17292914  | -4.63570702 | 1.11647485  |
| H | -3.57938577 | -2.26453668 | -3.23181943 |
| H | -3.63321496 | -4.55646960 | -2.28085535 |
| C | -3.88735960 | -6.42921093 | -0.44953347 |
| C | -4.16132233 | -5.40454221 | 1.81401336  |
| H | 1.10755298  | -7.28894294 | -1.70843222 |
| H | 1.60476023  | -6.30014507 | -3.10974966 |
| H | -0.11692096 | -6.38244643 | -2.60665364 |
| H | 2.68332387  | -6.27824828 | -0.23149553 |
| H | 2.81244805  | -4.53758822 | 0.05973187  |
| H | 3.33940158  | -5.21211961 | -1.50257233 |
| H | -1.46918080 | -4.46038576 | 2.64551988  |
| H | 1.06858718  | -4.41730243 | 1.69635441  |
| H | -3.64586406 | -7.36935910 | 0.06992341  |
| H | -3.33979590 | -6.43696834 | -1.40133303 |
| H | -4.97043881 | -6.41249302 | -0.65024361 |
| H | -3.85368996 | -4.65002209 | 2.55292881  |
| H | -3.89748931 | -6.38916634 | 2.22905642  |
| H | -5.25684878 | -5.35574940 | 1.71240069  |
| U | -1.20270002 | -2.68204385 | -0.43009214 |

[NpL<sup>2</sup>]<sup>+</sup>

Total energy: -30144.46431324 Hartree

|   |             |             |             |
|---|-------------|-------------|-------------|
| C | 0.22828719  | -0.48134275 | 0.34650493  |
| C | 0.26925218  | -1.24516436 | 1.53267943  |
| C | 1.32015403  | -0.20739841 | -0.69058979 |
| N | -1.06295939 | -0.10839598 | 0.05983418  |
| H | 1.14656752  | -1.65246606 | 2.03321496  |
| C | -1.06792013 | -1.26776403 | 2.03268240  |
| C | 0.99637317  | -1.34746250 | -1.66694239 |
| C | 1.14943241  | 1.18694288  | -1.31746763 |
| C | 2.72728396  | -0.30593686 | -0.07983224 |
| C | -1.83773571 | -0.51622943 | 1.11906756  |
| H | -1.38920342 | -1.69532553 | 2.98140878  |
| C | 0.01364284  | -1.20762146 | -2.67010766 |
| C | 1.45706373  | -2.64391661 | -1.36985530 |
| H | 1.84013926  | 1.31146186  | -2.16661644 |
| H | 1.38362031  | 1.95563156  | -0.56503808 |
| H | 0.11973373  | 1.36801692  | -1.65292116 |
| H | 3.49142848  | -0.22898051 | -0.86919702 |
| H | 2.90615798  | -1.23675853 | 0.47832195  |
| H | 2.87526255  | 0.52628359  | 0.62498226  |
| C | -3.34965798 | -0.28633525 | 1.05556274  |
| C | -3.71207645 | -1.42702152 | 0.09362537  |
| C | -3.82622200 | -2.73320994 | 0.60560716  |
| C | 0.92408099  | -3.79963787 | -1.97113128 |
| N | -1.21610014 | -5.30107294 | -0.58437754 |
| C | -0.48235670 | -2.34421259 | -3.32499153 |
| H | -0.37309494 | -0.22123937 | -2.92865922 |
| H | 2.20006618  | -2.76350128 | -0.58246208 |
| C | -3.67345840 | 1.10542587  | 0.48593879  |
| C | -4.00741975 | -0.41978965 | 2.43842305  |
| C | -3.63310350 | -1.26917438 | -1.30655110 |
| H | -3.86646399 | -2.86606541 | 1.68591679  |
| C | -3.78443180 | -3.87918737 | -0.21066197 |
| C | 1.17409813  | -5.16034829 | -1.30495131 |
| C | -0.05785262 | -3.63308903 | -2.97099135 |
| C | -1.97353991 | -5.12003861 | 0.54792121  |
| C | 0.09250663  | -5.08500243 | -0.22456642 |
| H | -1.22488615 | -2.22387950 | -4.11857821 |
| H | -4.75508603 | 1.19997434  | 0.29945566  |
| H | -3.12220033 | 1.31324284  | -0.44062943 |
| H | -3.37937822 | 1.87513046  | 1.21597391  |
| H | -5.10381900 | -0.37429914 | 2.34474538  |
| H | -3.68142058 | 0.41546221  | 3.07665058  |

|    |             |             |             |
|----|-------------|-------------|-------------|
| H  | -3.74858606 | -1.34923998 | 2.96670742  |
| C  | -3.65491873 | -2.39771139 | -2.13880325 |
| H  | -3.54028681 | -0.27466495 | -1.74438861 |
| C  | -3.70468759 | -3.69462528 | -1.60751736 |
| C  | -3.49574609 | -5.23926743 | 0.44099940  |
| C  | 0.92732567  | -6.34714864 | -2.25202092 |
| C  | 2.58013971  | -5.29572133 | -0.69873866 |
| H  | -0.49930035 | -4.50235581 | -3.45972724 |
| C  | -1.16805760 | -4.66028473 | 1.61183930  |
| C  | 0.16913383  | -4.63763689 | 1.11188481  |
| H  | -3.61903827 | -2.26417640 | -3.22346581 |
| H  | -3.66659409 | -4.55575958 | -2.27562264 |
| C  | -3.89562850 | -6.42862420 | -0.44886924 |
| C  | -4.15469275 | -5.40958027 | 1.81924526  |
| H  | 1.11106909  | -7.28852327 | -1.71172278 |
| H  | 1.61576293  | -6.30042531 | -3.11080300 |
| H  | -0.10868611 | -6.38076530 | -2.61416360 |
| H  | 2.67449366  | -6.28196695 | -0.21950485 |
| H  | 2.80869723  | -4.54130917 | 0.06845341  |
| H  | 3.34418939  | -5.22184916 | -1.48848966 |
| H  | -1.47085708 | -4.45933674 | 2.63850667  |
| H  | 1.06496475  | -4.41653934 | 1.69043122  |
| H  | -3.65192788 | -7.36900103 | 0.06898924  |
| H  | -3.35073845 | -6.43550423 | -1.40209842 |
| H  | -4.97955595 | -6.41186448 | -0.64497490 |
| H  | -3.84625193 | -4.65387378 | 2.55662394  |
| H  | -3.88233030 | -6.39284968 | 2.23186386  |
| H  | -5.25117445 | -5.36714673 | 1.72510047  |
| Np | -1.19145285 | -2.68603455 | -0.40049966 |

[PuL<sup>2</sup>]<sup>+</sup>

Total energy: -30949.11093064 Hartree

|   |             |             |             |
|---|-------------|-------------|-------------|
| C | 0.23293830  | -0.47261776 | 0.35035588  |
| C | 0.27867477  | -1.19870545 | 1.55952898  |
| C | 1.32526543  | -0.20803382 | -0.69152227 |
| N | -1.06313218 | -0.12916132 | 0.05108632  |
| H | 1.15887924  | -1.58613672 | 2.07161283  |
| C | -1.05931819 | -1.21734929 | 2.06304156  |
| C | 1.02594582  | -1.34641418 | -1.68206436 |
| C | 1.15099878  | 1.18713836  | -1.31774823 |
| C | 2.73070796  | -0.29826691 | -0.07391835 |
| C | -1.83791793 | -0.51165718 | 1.12544576  |
| H | -1.37577402 | -1.62545281 | 3.02214711  |

|   |             |             |             |
|---|-------------|-------------|-------------|
| C | 0.07323770  | -1.20628681 | -2.71239867 |
| C | 1.47826418  | -2.64197531 | -1.37785666 |
| H | 1.84642041  | 1.31701582  | -2.16222600 |
| H | 1.37532631  | 1.95642007  | -0.56295194 |
| H | 0.12220382  | 1.36181069  | -1.65993332 |
| H | 3.49761900  | -0.21256113 | -0.85959832 |
| H | 2.91387231  | -1.23090254 | 0.48002503  |
| H | 2.86999003  | 0.53179675  | 0.63522310  |
| C | -3.35216818 | -0.28906314 | 1.05625675  |
| C | -3.73968898 | -1.43042623 | 0.10007577  |
| C | -3.84763032 | -2.73514479 | 0.61317830  |
| C | 0.94939977  | -3.79546035 | -1.98363632 |
| N | -1.21981394 | -5.27909497 | -0.58598658 |
| C | -0.39692927 | -2.33737174 | -3.39463029 |
| H | -0.30955592 | -0.21900347 | -2.97529000 |
| H | 2.19664773  | -2.76454750 | -0.56754721 |
| C | -3.67123820 | 1.10291202  | 0.48267361  |
| C | -4.00681657 | -0.41300138 | 2.44215269  |
| C | -3.71163018 | -1.27190111 | -1.30240306 |
| H | -3.85415851 | -2.86830326 | 1.69480970  |
| C | -3.81674312 | -3.87930012 | -0.20262533 |
| C | 1.17664802  | -5.15767684 | -1.30550629 |
| C | 0.00444218  | -3.62454138 | -3.01839409 |
| C | -1.97536423 | -5.12967666 | 0.55157511  |
| C | 0.09635608  | -5.09092502 | -0.22113481 |
| H | -1.11703064 | -2.21390370 | -4.20848864 |
| H | -4.75321365 | 1.20320268  | 0.30108019  |
| H | -3.12315465 | 1.30286854  | -0.44769746 |
| H | -3.36896410 | 1.87401499  | 1.20786775  |
| H | -5.10299892 | -0.35956746 | 2.35089992  |
| H | -3.67286443 | 0.42129637  | 3.07749883  |
| H | -3.75430229 | -1.34374879 | 2.97137345  |
| C | -3.76521038 | -2.39562186 | -2.13537423 |
| H | -3.63033068 | -0.27607470 | -1.74051414 |
| C | -3.77729550 | -3.69130829 | -1.59975390 |
| C | -3.50019398 | -5.23896392 | 0.44373757  |
| C | 0.92366496  | -6.34420504 | -2.25236171 |
| C | 2.58145146  | -5.30324663 | -0.69727388 |
| H | -0.42854722 | -4.49399466 | -3.51517481 |
| C | -1.16196380 | -4.71187563 | 1.62638324  |
| C | 0.17780239  | -4.69375729 | 1.12753779  |
| H | -3.75964359 | -2.26235671 | -3.22089940 |
| H | -3.74509226 | -4.55264543 | -2.26865758 |
| C | -3.89700862 | -6.42888477 | -0.44826208 |

|    |             |             |             |
|----|-------------|-------------|-------------|
| C  | -4.15402268 | -5.41897636 | 1.82393350  |
| H  | 1.09794077  | -7.28651360 | -1.71055214 |
| H  | 1.61501608  | -6.30425374 | -3.10918314 |
| H  | -0.11174267 | -6.36905264 | -2.61743603 |
| H  | 2.66798258  | -6.28861791 | -0.21478106 |
| H  | 2.81548527  | -4.54730275 | 0.06686337  |
| H  | 3.34626473  | -5.23767655 | -1.48693305 |
| H  | -1.46133224 | -4.53287627 | 2.65857095  |
| H  | 1.07495910  | -4.49404269 | 1.71217015  |
| H  | -3.64481607 | -7.36958421 | 0.06489260  |
| H  | -3.35617852 | -6.42827802 | -1.40404371 |
| H  | -4.98186252 | -6.41857445 | -0.63958593 |
| H  | -3.85185456 | -4.66065504 | 2.56142208  |
| H  | -3.87138187 | -6.40018202 | 2.23462190  |
| H  | -5.25099834 | -5.38681406 | 1.73231609  |
| Pu | -1.17449271 | -2.69204365 | -0.35538059 |

[K(C<sub>24</sub>H<sub>12</sub>)]

Total energy: -1523.260785 Hartree

|   |            |             |             |
|---|------------|-------------|-------------|
| K | 2.50223501 | -2.60353807 | 1.91615846  |
| C | 1.28651404 | -2.88879857 | -1.06178767 |
| C | 2.33877296 | -3.73690072 | -0.83885431 |
| C | 3.27252244 | -4.38778540 | -0.35213644 |
| C | 3.56671083 | -0.41881362 | 0.09951683  |
| C | 2.11354853 | -0.56474340 | -0.08466852 |
| C | 1.23299619 | -1.54975082 | -0.64821535 |
| C | 4.90878425 | -1.16573670 | -0.03568562 |
| C | 3.94743216 | 0.97729073  | 0.16795051  |
| C | 5.31255041 | 1.13799184  | -0.09199788 |
| C | 5.88920943 | -0.11791514 | -0.26157668 |
| C | 5.99438105 | 2.36054417  | -0.14058098 |
| C | 5.20141346 | 3.51812869  | 0.10752632  |
| C | 3.83781520 | 3.39318414  | 0.35321766  |
| C | 3.17288827 | 2.13118100  | 0.36515033  |
| C | 1.77741954 | 1.88751941  | 0.51235148  |
| C | 1.32026056 | 0.62231587  | 0.27187081  |
| C | 4.28373739 | -4.66266224 | 0.54995522  |
| C | 5.15525098 | -3.66743198 | 0.94245485  |
| C | 5.54739896 | -2.42557392 | 0.20559715  |
| C | 6.94463334 | -2.54527423 | -0.12322936 |
| C | 7.79887446 | -1.51681324 | -0.47793544 |
| C | 7.27555658 | -0.20887208 | -0.46895446 |
| C | 7.39755603 | 2.26081765  | -0.42343483 |

C 8.00087560 1.02832000 -0.58158075  
H 0.23634550 0.46901134 0.28297195  
H 1.07533996 2.69618247 0.73754796  
H 0.36615033 -3.29655380 -1.49558008  
H 0.22800057 -1.13715663 -0.78814887  
H 5.66355853 4.50969133 0.10119632  
H 3.24110913 4.29384597 0.52966031  
H 4.38140486 -5.66185865 0.99539901  
H 5.90189765 -3.95724555 1.69273324  
H 7.36566600 -3.55051433 -0.02477755  
H 8.85457024 -1.71574684 -0.68294602  
H 7.99886512 3.17174745 -0.50356167  
H 9.07600965 0.97896935 -0.78156163

[K(C<sub>24</sub>H<sub>12</sub>)]<sup>+</sup>

Total energy: -1523.094310 Hartree

K 3.30132701 -1.74653987 2.59961576  
C 1.13293624 -2.93142965 -0.86746246  
C 1.96967195 -3.64194951 -0.03132092  
C 2.89176589 -4.09692997 0.63430151  
C 3.55032051 -0.48283383 -0.06264949  
C 2.14709043 -0.59045449 -0.38535262  
C 1.30130553 -1.59091274 -1.04320627  
C 4.91051159 -1.22540104 -0.18402900  
C 3.92251540 0.89761623 0.20618554  
C 5.29806483 1.07473124 0.05904543  
C 5.88363669 -0.15525051 -0.24363749  
C 5.96948279 2.29692528 0.12615481  
C 5.15234625 3.43401388 0.42643319  
C 3.78314286 3.29875745 0.55618873  
C 3.12196754 2.03434653 0.39625896  
C 1.72965350 1.81387031 0.28892523  
C 1.31408444 0.57635892 -0.13983891  
C 4.16937131 -4.46937989 1.01796511  
C 5.27719685 -3.77272658 0.60857468  
C 5.56929050 -2.51092347 -0.06943180  
C 6.97088543 -2.55420729 -0.47165484  
C 7.79227047 -1.48598708 -0.72282758  
C 7.26429286 -0.19478417 -0.49005329  
C 7.37285854 2.24666212 -0.15232281  
C 7.98478194 1.04441847 -0.45555838  
H 0.24635502 0.44274836 -0.33495959  
H 1.00494950 2.61751882 0.44632115



H 0.30676344 -3.43682973 -1.37724905  
H 0.55114427 -1.12250305 -1.68982004  
H 5.61038887 4.42220011 0.52351980  
H 3.16999973 4.18422274 0.74626120  
H 4.32773366 -5.41581207 1.54686938  
H 6.20564236 -4.30069713 0.85231093  
H 7.41018918 -3.55388506 -0.52680984  
H 8.83496378 -1.64131892 -1.01101574  
H 7.96345174 3.16662371 -0.13665745  
H 9.05590233 1.02679734 -0.67502953
